# Supplementary material
Source: MDPI journal article supplement (https://www.mdpi.com/2076-3417/13/9/5781)
Supplement: s1 [file s1]

## Supplementary data

### Bioprocessing of hempseed (*Cannabis sativa* L.) food by-products increased nutrient and phytochemical *in vitro* bioavailability during digestion and microbial fermentation

Songtao Fan, Zhihong Zhang, Gary J. Duncan, Amanda Morris, Lorraine Scobbie, Donna Henderson, Philip Morrice, Wendy R. Russell, Sylvia H. Duncan and Madalina Neacsu

Table S1: Quantitative profiling of plant metabolites from the hempseed screenings by targeted LC–MS/MS, concentration in mg/kg, as average n=3 determinations  $\pm$  STD. Where Free fraction compounds are presented in SET A, Alkaline-bound fraction compounds in SET B, Acid-bound fraction presented in SETC and Total compounds in SET D.

| SET A<br>compounds name (mg/Kg) | Initial matrix | First bioprocess |              |              |              | Second bioprocess |              |              |
|---------------------------------|----------------|------------------|--------------|--------------|--------------|-------------------|--------------|--------------|
|                                 | Free fraction  |                  |              |              |              |                   |              |              |
|                                 | Raw            | EM_1             | BY_1         | EM+BY_1      | EM_2         | EC_2              | BY_2         | EC+BY_2      |
| benzoic acid                    | 2.39 ± 0.25    | 4.77 ± 0.69      | 10.46 ± 1.49 | 11.98 ± 0.94 | 3.48 ± 1.52  | 3.86 ± 0.56       | 12.83 ± 1.12 | 13.48 ± 1.28 |
| Salicylic acid                  | 17.80 ± 2.34   | 30.84 ± 4.50     | 30.87 ± 4.49 | 33.13 ± 1.99 | 31.25 ± 4.68 | 34.17 ± 0.86      | 37.30 ± 3.54 | 34.55 ± 1.77 |
| p-hydroxybenzoic acid           | 8.38 ± 1.38    | 18.06 ± 2.03     | 22.65 ± 4.28 | 29.47 ± 3.12 | 15.76 ± 3.51 | 20.44 ± 2.21      | 20.89 ± 2.50 | 20.26 ± 1.47 |
| 2, 3-dihydroxybenzoic acid      | nd             | nd               | nd           | nd           | 0.63 ± 0.04  | 0.74 ± 0.18       | 0.68 ± 0.09  | 0.58 ± 0.06  |
| 2, 4-dihydroxybenzoic acid      | nd             | nd               | nd           | nd           | nd           | nd                | nd           | nd           |
| gentisic acid                   | nd             | nd               | nd           | nd           | 1.60 ± 1.13  | 4.59 ± 1.01       | 4.18 ± 2.59  | 7.53 ± 3.96  |
| 2, 6-dihydroxybenzoic acid      | 0.06 ± 0.01    | 0.12 ± 0.02      | 0.12 ± 0.03  | 0.12 ± 0.00  | 0.30 ± 0.02  | 0.34 ± 0.02       | 0.31 ± 0.03  | 0.28 ± 0.02  |
| protocatechuic acid             | 7.74 ± 0.73    | 3.59 ± 0.82      | 4.65 ± 0.59  | 4.32 ± 0.65  | 5.53 ± 0.70  | 6.22 ± 0.21       | 6.97 ± 0.82  | 6.02 ± 0.52  |

|                                         |             |              |              |              |              |              |              |              |
|-----------------------------------------|-------------|--------------|--------------|--------------|--------------|--------------|--------------|--------------|
| 2-methoxybenzoic acid                   | nd          | nd           | nd           | nd           | nd           | nd           | nd           | nd           |
| 4-methoxybenzoic acid                   | nd          | nd           | nd           | nd           | nd           | nd           | nd           | nd           |
| 3, 4, 5-trihydroxybenzoic acid          | nd          | nd           | nd           | nd           | 0.36 ± 0.03  | nd           | 0.42 ± 0.04  | 0.49 ± 0.07  |
| Vanillic acid                           | 2.15 ± 0.49 | 8.32 ± 1.12  | 9.36 ± 1.87  | 10.92 ± 0.68 | 5.80 ± 1.35  | 6.98 ± 0.51  | 7.61 ± 0.92  | 7.03 ± 0.25  |
| 3, 5-dimethoxy-4-hydroxybenzoic acid    | 0.42 ± 0.10 | 1.17 ± 0.30  | 1.33 ± 0.32  | 1.33 ± 0.23  | 0.84 ± 0.17  | 1.04 ± 0.04  | 1.09 ± 0.16  | 1.04 ± 0.11  |
| p-Hydroxybenzaldehyde                   | 5.80 ± 0.58 | 9.08 ± 0.93  | 3.80 ± 1.14  | 3.32 ± 0.18  | 8.85 ± 1.40  | 8.65 ± 1.55  | 9.15 ± 0.54  | 8.49 ± 0.78  |
| protocatechualdehyde                    | 4.26 ± 0.82 | 2.11 ± 0.29  | 2.28 ± 0.44  | 2.60 ± 0.17  | 3.60 ± 0.56  | 3.82 ± 0.56  | 4.23 ± 0.38  | 4.15 ± 0.41  |
| 3, 4, 5--trihydroxybenzaldehyde         | nd          | nd           | nd           | nd           | nd           | nd           | nd           | nd           |
| vanillin                                | 2.20 ± 0.13 | 3.72 ± 0.73  | 1.58 ± 0.27  | 1.46 ± 0.14  | 3.48 ± 0.53  | 3.46 ± 0.69  | 3.31 ± 0.08  | 3.18 ± 0.34  |
| 3, 5-dimethoxy-4-hydroxybenzaldehyde    | 0.48 ± 0.33 | 1.35 ± 0.28  | 1.10 ± 0.29  | 1.20 ± 0.10  | 1.19 ± 0.23  | 1.26 ± 0.08  | 1.29 ± 0.14  | 1.31 ± 0.09  |
| cinnamic acid                           | 0.19 ± 0.04 | 0.26 ± 0.03  | 0.32 ± 0.01  | 0.27 ± 0.05  | 0.49 ± 0.08  | 0.51 ± 0.04  | 0.54 ± 0.05  | 0.51 ± 0.05  |
| p-Coumaric acid                         | 1.22 ± 0.16 | 0.65 ± 0.13  | 0.81 ± 0.11  | 1.32 ± 0.13  | 2.44 ± 0.50  | 3.08 ± 0.37  | 3.33 ± 0.38  | 3.75 ± 0.28  |
| caffeic acid                            | 0.09 ± 0.04 | 0.73 ± 0.21  | 0.85 ± 0.11  | 1.10 ± 0.05  | 3.03 ± 0.59  | 3.55 ± 1.23  | 3.54 ± 0.39  | 4.01 ± 0.17  |
| ferulic acid                            | 0.99 ± 0.11 | 14.57 ± 2.68 | 20.52 ± 3.32 | 19.37 ± 0.83 | 23.91 ± 5.70 | 30.89 ± 1.64 | 35.41 ± 3.62 | 33.46 ± 1.62 |
| 3, 5-dimethoxy-4-hydroxycinnamic acid   | nd          | nd           | nd           | nd           | nd           | nd           | nd           | nd           |
| 3-hydroxyphenylpropionic acid           | 0.55 ± 0.11 | 0.88 ± 0.16  | 0.77 ± 0.13  | 0.96 ± 0.07  | 1.08 ± 0.29  | 1.33 ± 0.03  | 1.38 ± 0.16  | 1.28 ± 0.01  |
| Phloretic acid                          | 1.53 ± 0.35 | nd           | nd           | 2.42 ± 0.30  | 3.90 ± 1.03  | 5.04 ± 0.38  | 5.10 ± 0.72  | 4.86 ± 0.44  |
| 3-methoxy-4-hydroxyphenylpropionic acid | nd          | 0.22 ± 0.02  | 0.23 ± 0.08  | 0.30 ± 0.07  | 0.28 ± 0.07  | 0.37 ± 0.03  | 0.32 ± 0.01  | 0.37 ± 0.03  |
| 4-hydroxyacetophenone                   | 0.01 ± 0.00 | 0.05 ± 0.02  | 0.06 ± 0.02  | 0.07 ± 0.01  | 0.11 ± 0.00  | 0.12 ± 0.01  | 0.12 ± 0.01  | 0.11 ± 0.00  |
| 3-methoxy-4-hydroxyacetophenone         | nd          | 0.09 ± 0.01  | 0.11 ± 0.03  | 0.11 ± 0.02  | 0.15 ± 0.02  | 0.14 ± 0.00  | 0.14 ± 0.01  | 0.13 ± 0.01  |

|                                                              |             |             |             |             |             |             |             |             |
|--------------------------------------------------------------|-------------|-------------|-------------|-------------|-------------|-------------|-------------|-------------|
| 3, 5-dimethoxy-4-hydroxyacetophenone                         | nd          | nd          | nd          | nd          | nd          | 0.08 ± 0.07 | nd          | nd          |
| phenylacetic acid                                            | 0.24 ± 0.02 | 0.66 ± 0.15 | 5.22 ± 0.74 | 5.57 ± 0.23 | nd          | nd          | nd          | nd          |
| 4-hydroxyphenylacetic acid                                   | nd          | nd          | nd          | nd          | nd          | nd          | 2.24 ± 0.30 | 2.90 ± 0.14 |
| 3, 4-dihydroxyphenylacetic acid<br>(Homoprotocatechuic acid) | nd          | nd          | nd          | nd          | 6.35 ± 1.58 | 7.82 ± 0.52 | 8.67 ± 0.83 | 7.91 ± 0.70 |
| indole-3-acetic acid                                         | nd          | nd          | nd          | 0.12 ± 0.01 | 0.20 ± 0.02 | 0.21 ± 0.01 | 0.33 ± 0.03 | 0.30 ± 0.02 |
| indole-3-carboxylic acid                                     | 0.46 ± 0.04 | 1.02 ± 0.41 | 1.02 ± 0.05 | 1.28 ± 0.20 | 1.56 ± 0.33 | 1.66 ± 0.18 | 1.86 ± 0.07 | 1.67 ± 0.17 |
| indole-4-propionic acid                                      | nd          | nd          | nd          | nd          | 0.14 ± 0.01 | 0.14 ± 0.01 | 0.14 ± 0.01 | nd          |
| Chlorogenic acid                                             | 0.07 ± 0.12 | nd          | nd          | nd          | 0.51 ± 0.01 | 0.50 ± 0.16 | 0.46 ± 0.02 | 0.35 ± 0.02 |
| 3-hydroxymandelic acid                                       | nd          |
| 3, 4-dihydroxymandelic acid                                  | 0.31 ± 0.06 | 0.13 ± 0.11 | nd          | 0.06 ± 0.06 | nd          | nd          | nd          | nd          |
| 4-hydroxy-3-methoxy-mandelic acid                            | nd          |
| phenyllactic acid                                            | nd          | 0.05 ± 0.02 | 0.83 ± 0.12 | 0.99 ± 0.08 | nd          | nd          | 0.27 ± 0.06 | 0.26 ± 0.03 |
| 4-hydroxyphenyllactic acid                                   | nd          | nd          | nd          | nd          | nd          | nd          | 0.48 ± 0.03 | 0.40 ± 0.07 |
| phenylpyruvic acid                                           | nd          | nd          | 0.52 ± 0.11 | 0.71 ± 0.09 | 0.13 ± 0.05 | 0.13 ± 0.11 | 0.17 ± 0.06 | 0.25 ± 0.02 |
| ethylferulate                                                | nd          | nd          | nd          | nd          | 0.21 ± 0.02 | 0.20 ± 0.02 | 0.20 ± 0.01 | 0.20 ± 0.00 |
| catechin                                                     | nd          |
| epicatechin                                                  | nd          |
| gallocatechin                                                | nd          |
| epigallocatechin                                             | nd          |

|                       |             |             |             |             |             |             |             |             |
|-----------------------|-------------|-------------|-------------|-------------|-------------|-------------|-------------|-------------|
| isoliquiritigenin     | 0.08 ± 0.00 | nd          |
| naringenin            | nd          | nd          | 0.00 ± 0.01 | 0.01 ± 0.00 | nd          | nd          | nd          | nd          |
| kaempferol            | nd          |
| quercetin             | nd          | nd          | 0.13 ± 0.12 | 0.06 ± 0.10 | nd          | 0.14 ± 0.13 | 0.11 ± 0.10 | 0.18 ± 0.06 |
| quercetin-3-glucoside | 0.40 ± 0.03 | 0.25 ± 0.04 | 0.26 ± 0.03 | 0.23 ± 0.02 | 0.12 ± 0.03 | 0.08 ± 0.03 | 0.09 ± 0.01 | 0.09 ± 0.01 |
| taxifolin             | nd          | nd          | nd          | nd          | 0.20 ± 0.08 | 0.24 ± 0.06 | 0.28 ± 0.03 | 0.26 ± 0.00 |
| biochanin a           | 0.08 ± 0.01 | 0.43 ± 0.02 | 0.40 ± 0.09 | 0.47 ± 0.03 | nd          | nd          | nd          | nd          |
| luteolin              | 0.47 ± 0.05 | 2.97 ± 0.54 | 3.06 ± 0.74 | 3.57 ± 0.22 | 2.64 ± 0.82 | 2.91 ± 1.14 | 3.38 ± 0.43 | 3.21 ± 0.71 |
| apigenin              | 0.14 ± 0.01 | 0.96 ± 0.11 | 0.79 ± 0.13 | 1.00 ± 0.16 | 1.02 ± 0.28 | 1.15 ± 0.19 | 1.03 ± 0.09 | 1.19 ± 0.17 |
| tyrosol               | nd          |
| hydroxytyrosol        | nd          | 0.01 ± 0.00 | 0.01 ± 0.01 | 0.01 ± 0.00 | nd          | nd          | 0.02 ± 0.01 | 0.04 ± 0.01 |
| isorhamnetin          | nd          | 0.22 ± 0.04 | 0.30 ± 0.07 | 0.28 ± 0.01 | 0.11 ± 0.09 | 0.26 ± 0.24 | 0.31 ± 0.07 | 0.37 ± 0.09 |
| rutin                 | 0.21 ± 0.01 | nd          |
| vitexin               | 0.07 ± 0.01 | 0.13 ± 0.04 | 0.16 ± 0.10 | 0.15 ± 0.01 | 0.26 ± 0.19 | 0.16 ± 0.04 | 0.16 ± 0.01 | 0.14 ± 0.02 |
| isovitexin            | 0.07 ± 0.01 | 0.13 ± 0.04 | 0.16 ± 0.10 | 0.15 ± 0.01 | 0.25 ± 0.20 | 0.15 ± 0.04 | 0.15 ± 0.01 | 0.10 ± 0.09 |
| hyperoside            | 0.45 ± 0.09 | 0.24 ± 0.06 | 0.25 ± 0.05 | 0.20 ± 0.01 | 0.14 ± 0.03 | 0.10 ± 0.03 | 0.10 ± 0.00 | 0.10 ± 0.01 |
| hesperitin            | nd          | 0.01 ± 0.00 |
| ferulic dimer 8-5c    | nd          |
| secoisolariciresinol  | nd          |
| syringaresinol        | nd          |

|             |    |                 |                 |                 |                 |                 |                 |                 |
|-------------|----|-----------------|-----------------|-----------------|-----------------|-----------------|-----------------|-----------------|
| pinoresinol | nd | $0.67 \pm 0.09$ | $0.67 \pm 0.19$ | $0.66 \pm 0.12$ | $0.49 \pm 0.11$ | $0.57 \pm 0.06$ | $0.79 \pm 0.03$ | $0.72 \pm 0.06$ |
|-------------|----|-----------------|-----------------|-----------------|-----------------|-----------------|-----------------|-----------------|

| SET B<br>compounds name (mg/Kg)      | Initial matrix          | First bioprocess |              |              | Second bioprocess |              |              |              |
|--------------------------------------|-------------------------|------------------|--------------|--------------|-------------------|--------------|--------------|--------------|
|                                      | Alkaline-bound fraction |                  |              |              |                   |              |              |              |
|                                      | Raw                     | EM_1             | BY_1         | EM+BY_1      | EM_2              | EC_2         | BY_2         | EC+BY_2      |
| benzoic acid                         | 1.54 ± 0.57             | 1.21 ± 0.20      | 0.97 ± 0.84  | 1.30 ± 0.48  | 0.99 ± 0.26       | 1.66 ± 0.26  | 1.58 ± 0.49  | 0.93 ± 0.61  |
| Salicylic acid                       | 5.53 ± 1.84             | 1.58 ± 0.09      | 1.49 ± 0.48  | 1.74 ± 0.22  | 3.43 ± 0.61       | 3.85 ± 0.39  | 3.92 ± 0.26  | 3.11 ± 0.65  |
| p-hydroxybenzoic acid                | 8.23 ± 2.10             | 3.65 ± 0.22      | 3.71 ± 1.01  | 4.42 ± 0.78  | 6.65 ± 0.46       | 6.50 ± 0.32  | 7.11 ± 1.23  | 5.64 ± 1.05  |
| 2, 3-dihydroxybenzoic acid           | nd                      | nd               | nd           | nd           | 0.24 ± 0.01       | 0.29 ± 0.01  | 0.24 ± 0.01  | 0.24 ± 0.01  |
| 2, 4-dihydroxybenzoic acid           | nd                      | nd               | nd           | nd           | 0.66 ± 0.03       | 0.52 ± 0.04  | 0.19 ± 0.32  | 0.35 ± 0.30  |
| gentisic acid                        | nd                      | nd               | nd           | nd           | 0.54 ± 0.09       | 0.85 ± 0.03  | 0.68 ± 0.07  | 0.59 ± 0.05  |
| 2, 6-dihydroxybenzoic acid           | 0.03 ± 0.02             | 0.03 ± 0.00      | 0.04 ± 0.02  | 0.04 ± 0.01  | nd                | nd           | nd           | nd           |
| protocatechuic acid                  | 22.53 ± 7.34            | 15.21 ± 1.32     | 15.65 ± 4.54 | 19.03 ± 2.20 | 32.79 ± 2.61      | 29.09 ± 2.28 | 34.47 ± 1.97 | 27.27 ± 2.74 |
| 2-methoxybenzoic acid                | nd                      | nd               | nd           | nd           | nd                | nd           | nd           | nd           |
| 4-methoxybenzoic acid                | nd                      | nd               | nd           | nd           | 1.05 ± 0.09       | 0.54 ± 0.06  | 0.97 ± 0.11  | 0.67 ± 0.36  |
| 3, 4, 5-trihydroxybenzoic acid       | 0.09 ± 0.06             | nd               | nd           | nd           | nd                | 0.25 ± 0.02  | 0.22 ± 0.03  | nd           |
| Vanillic acid                        | 3.83 ± 0.94             | 3.19 ± 0.10      | 3.09 ± 0.92  | 3.40 ± 0.63  | 6.27 ± 0.38       | 6.36 ± 0.34  | 6.84 ± 0.96  | 5.54 ± 0.76  |
| 3, 5-dimethoxy-4-hydroxybenzoic acid | 1.02 ± 0.17             | 0.68 ± 0.08      | 0.61 ± 0.26  | 0.67 ± 0.10  | 1.56 ± 0.16       | 1.55 ± 0.11  | 1.62 ± 0.17  | 1.35 ± 0.18  |
| p-Hydroxybenzaldehyde                | 6.64 ± 1.28             | 4.25 ± 0.34      | 4.31 ± 0.93  | 4.98 ± 0.43  | 6.76 ± 0.17       | 6.24 ± 0.03  | 7.15 ± 1.08  | 5.94 ± 0.81  |

|                                                              |               |              |              |              |              |              |              |               |
|--------------------------------------------------------------|---------------|--------------|--------------|--------------|--------------|--------------|--------------|---------------|
| protocatechualdehyde                                         | 32.97 ± 5.62  | 19.42 ± 1.66 | 19.33 ± 3.53 | 22.23 ± 2.92 | 29.54 ± 1.36 | 26.48 ± 0.95 | 29.85 ± 3.36 | 27.10 ± 2.07  |
| 3, 4, 5--trihydroxybenzaldehyde                              | nd            | nd           | nd           | nd           | 2.03 ± 2.78  | 0.37 ± 0.03  | 0.37 ± 0.02  | 0.44 ± 0.18   |
| vanillin                                                     | 9.37 ± 0.93   | 7.52 ± 0.61  | 7.91 ± 2.04  | 8.58 ± 0.33  | 14.85 ± 1.13 | 14.92 ± 0.53 | 16.46 ± 2.21 | 13.77 ± 1.71  |
| 3, 5-dimethoxy-4-hydroxybenzaldehyde                         | 3.94 ± 0.49   | 2.70 ± 0.36  | 2.71 ± 0.62  | 2.77 ± 0.29  | 7.29 ± 0.15  | 6.88 ± 0.26  | 7.63 ± 0.86  | 6.51 ± 0.70   |
| cinnamic acid                                                | 0.06 ± 0.02   | 0.07 ± 0.03  | 0.08 ± 0.03  | 0.10 ± 0.02  | 0.27 ± 0.05  | 0.27 ± 0.02  | 0.31 ± 0.03  | 0.23 ± 0.04   |
| p-Coumaric acid                                              | 45.76 ± 11.22 | 36.25 ± 2.46 | 33.78 ± 7.18 | 37.65 ± 6.19 | 75.51 ± 5.56 | 79.18 ± 2.87 | 80.49 ± 8.65 | 69.27 ± 10.43 |
| caffeic acid                                                 | 0.98 ± 0.50   | 1.46 ± 0.20  | 1.22 ± 0.37  | 1.32 ± 0.15  | 2.83 ± 0.27  | 3.51 ± 0.03  | 3.24 ± 0.36  | 2.64 ± 0.47   |
| ferulic acid                                                 | 5.64 ± 1.23   | 2.97 ± 0.29  | 3.00 ± 0.69  | 3.31 ± 0.37  | 6.25 ± 0.53  | 6.75 ± 0.26  | 6.58 ± 0.88  | 6.05 ± 1.29   |
| 3, 5-dimethoxy-4-hydroxycinnamic acid                        | nd            | nd           | nd           | nd           | 0.33 ± 0.02  | 0.37 ± 0.01  | 0.39 ± 0.01  | 0.36 ± 0.03   |
| 3-hydroxyphenylpropionic acid                                | 0.72 ± 0.18   | 0.50 ± 0.04  | 0.61 ± 0.10  | 0.65 ± 0.08  | nd           | nd           | nd           | nd            |
| Phloretic acid                                               | 1.61 ± 0.20   | nd           | nd           | nd           | 5.41 ± 0.52  | 5.59 ± 0.19  | 6.26 ± 0.84  | 4.98 ± 1.16   |
| 3-methoxy-4-hydroxyphenylpropionic acid                      | nd            | nd           | nd           | nd           | nd           | nd           | nd           | nd            |
| 4-hydroxyacetophenone                                        | 0.08 ± 0.01   | 0.07 ± 0.01  | 0.05 ± 0.02  | 0.07 ± 0.02  | 0.13 ± 0.01  | 0.13 ± 0.01  | 0.13 ± 0.01  | 0.12 ± 0.01   |
| 3-methoxy-4-hydroxyacetophenone                              | 0.07 ± 0.02   | 0.07 ± 0.01  | 0.05 ± 0.05  | 0.06 ± 0.05  | 0.22 ± 0.02  | 0.22 ± 0.02  | 0.24 ± 0.04  | 0.21 ± 0.02   |
| 3, 5-dimethoxy-4-hydroxyacetophenone                         | nd            | nd           | nd           | nd           | 0.19 ± 0.01  | 0.21 ± 0.01  | 0.23 ± 0.03  | 0.20 ± 0.03   |
| phenylacetic acid                                            | 0.07 ± 0.00   | 0.15 ± 0.06  | 0.12 ± 0.02  | 0.18 ± 0.05  | nd           | nd           | nd           | nd            |
| 4-hydroxyphenylacetic acid                                   | nd            | nd           | nd           | nd           | nd           | nd           | nd           | nd            |
| 3, 4-dihydroxyphenylacetic acid<br>(Homoprotocatechuic acid) | nd            | nd           | nd           | nd           | 4.71 ± 0.28  | 4.91 ± 0.36  | 5.35 ± 0.81  | 4.35 ± 0.62   |
| indole-3-acetic acid                                         | 0.08 ± 0.04   | nd           | nd           | nd           | 0.17 ± 0.00  | 0.16 ± 0.01  | 0.17 ± 0.01  | 0.16 ± 0.01   |
| indole-3-carboxylic acid                                     | 0.81 ± 0.30   | 0.35 ± 0.02  | 0.30 ± 0.09  | 0.39 ± 0.05  | 0.82 ± 0.08  | 0.84 ± 0.06  | 0.85 ± 0.09  | 0.77 ± 0.11   |
| indole-4-propionic acid                                      | nd            | nd           | nd           | nd           | nd           | nd           | nd           | nd            |
| Chlorogenic acid                                             | nd            | nd           | nd           | nd           | 0.12 ± 0.10  | 0.19 ± 0.01  | 0.11 ± 0.10  | nd            |
| 3-hydroxymandelic acid                                       | 1.49 ± 0.94   | 2.32 ± 0.27  | 1.44 ± 0.25  | 1.94 ± 0.25  | nd           | nd           | nd           | nd            |
| 3, 4-dihydroxymandelic acid                                  | 0.32 ± 0.13   | 0.27 ± 0.17  | 0.14 ± 0.21  | 0.27 ± 0.17  | nd           | nd           | nd           | nd            |
| 4-hydroxy-3-methoxy-mandelic acid                            | nd            | nd           | nd           | nd           | nd           | nd           | nd           | nd            |
| phenyllactic acid                                            | nd            | nd           | nd           | nd           | nd           | nd           | nd           | nd            |

|                            |             |             |             |             |             |              |             |             |
|----------------------------|-------------|-------------|-------------|-------------|-------------|--------------|-------------|-------------|
| 4-hydroxyphenyllactic acid | 1.20 ± 0.46 | nd          | nd          | nd          | nd          | nd           | nd          | nd          |
| phenylpyruvic acid         | nd          | 0.38 ± 0.06 | 0.37 ± 0.08 | 0.48 ± 0.05 | 0.74 ± 0.01 | 0.89 ± 0.24  | 0.67 ± 0.14 | 0.71 ± 0.22 |
| ethylferulate              | nd          | nd          | nd          | nd          | nd          | nd           | nd          | nd          |
| catechin                   | 1.72 ± 1.49 | 2.63 ± 1.06 | 5.57 ± 2.65 | 3.91 ± 2.37 | 3.35 ± 1.72 | 10.61 ± 2.23 | 9.63 ± 2.35 | 6.26 ± 1.20 |
| epicatechin                | nd          | nd          | nd          | nd          | 0.18 ± 0.32 | 1.35 ± 0.42  | 1.06 ± 0.26 | 0.80 ± 0.25 |
| gallocatechin              | nd          | 0.90 ± 0.22 | 0.83 ± 0.60 | 0.64 ± 0.27 | 0.20 ± 0.04 | 0.52 ± 0.27  | 0.65 ± 0.36 | 0.25 ± 0.07 |
| epigallocatechin           | nd          | 0.35 ± 0.07 | 0.22 ± 0.08 | 0.25 ± 0.12 | nd          | nd           | nd          | nd          |
| isoliquiritigenin          | nd          | nd          | nd          | nd          | nd          | nd           | nd          | nd          |
| naringenin                 | nd          | nd          | nd          | nd          | nd          | nd           | nd          | nd          |
| kaempferol                 | nd          | nd          | nd          | nd          | nd          | 0.15 ± 0.00  | 0.16 ± 0.01 | 0.13 ± 0.02 |
| quercetin                  | 0.42 ± 0.20 | 0.90 ± 0.20 | 1.03 ± 0.24 | 1.15 ± 0.28 | 0.88 ± 0.07 | 1.13 ± 0.09  | 1.08 ± 0.39 | 0.87 ± 0.16 |
| quercetin-3-glucoside      | 0.15 ± 0.03 | 0.10 ± 0.03 | 0.08 ± 0.02 | 0.09 ± 0.03 | 0.07 ± 0.00 | 0.10 ± 0.02  | 0.09 ± 0.01 | 0.07 ± 0.02 |
| taxifolin                  | 0.20 ± 0.19 | 0.36 ± 0.08 | 0.36 ± 0.08 | 0.35 ± 0.11 | 0.41 ± 0.07 | 0.67 ± 0.05  | 0.74 ± 0.10 | 0.46 ± 0.11 |
| biochanin a                | nd          | nd          | nd          | nd          | nd          | nd           | nd          | nd          |
| luteolin                   | 0.30 ± 0.08 | 0.37 ± 0.07 | 0.34 ± 0.07 | 0.38 ± 0.05 | 0.51 ± 0.02 | 0.55 ± 0.08  | 0.58 ± 0.06 | 0.48 ± 0.09 |
| apigenin                   | 0.10 ± 0.00 | 0.10 ± 0.00 | 0.10 ± 0.01 | 0.10 ± 0.00 | 0.10 ± 0.00 | 0.10 ± 0.00  | 0.10 ± 0.00 | 0.10 ± 0.01 |
| tyrosol                    | 0.02 ± 0.03 | nd          | nd          | nd          | nd          | nd           | nd          | nd          |
| hydroxytyrosol             | 0.12 ± 0.03 | 0.07 ± 0.04 | 0.07 ± 0.06 | 0.06 ± 0.04 | nd          | nd           | nd          | nd          |
| isorhamnetin               | 0.22 ± 0.03 | 0.32 ± 0.04 | 0.29 ± 0.03 | 0.29 ± 0.03 | 0.30 ± 0.01 | 0.37 ± 0.04  | 0.33 ± 0.05 | 0.30 ± 0.03 |
| rutin                      | nd          | nd          | nd          | nd          | nd          | 0.04 ± 0.07  | nd          | nd          |
| vitexin                    | nd          | nd          | nd          | nd          | 0.03 ± 0.05 | 0.04 ± 0.06  | nd          | 0.04 ± 0.07 |
| isovitexin                 | nd          | nd          | nd          | nd          | nd          | nd           | nd          | nd          |
| hyperoside                 | 0.13 ± 0.02 | 0.08 ± 0.02 | 0.06 ± 0.01 | 0.07 ± 0.03 | 0.08 ± 0.01 | 0.10 ± 0.02  | 0.09 ± 0.01 | 0.07 ± 0.01 |
| hesperitin                 | nd          | nd          | nd          | nd          | nd          | nd           | nd          | nd          |
| ferulic dimer 8-5c         | nd          | 0.49 ± 0.06 | 0.30 ± 0.06 | 0.36 ± 0.04 | nd          | nd           | nd          | nd          |
| secoisolariciresinol       | 0.21 ± 0.07 | 0.22 ± 0.01 | 0.18 ± 0.04 | 0.23 ± 0.06 | 0.20 ± 0.01 | 0.13 ± 0.01  | 0.19 ± 0.07 | 0.16 ± 0.09 |
| syringaresinol             | nd          | nd          | nd          | nd          | 1.12 ± 1.93 | 2.81 ± 2.43  | 1.24 ± 2.15 | 2.27 ± 1.97 |
| pinoresinol                | nd          | nd          | nd          | nd          | 0.18 ± 0.00 | 0.18 ± 0.02  | 0.17 ± 0.01 | 0.17 ± 0.04 |

| SET C<br>compounds name (mg/Kg)       | Initial matrix      | First bioprocess |              |              | Second bioprocess |              |              |              |
|---------------------------------------|---------------------|------------------|--------------|--------------|-------------------|--------------|--------------|--------------|
|                                       | Acid-bound fraction |                  |              |              |                   |              |              |              |
|                                       | Raw                 | EM_1             | BY_1         | EM+BY_1      | EM_2              | EC_2         | BY_2         | EC+BY_2      |
| benzoic acid                          | 1.83 ± 0.40         | 1.28 ± 0.08      | 1.04 ± 0.49  | 0.74 ± 0.16  | 0.69 ± 0.34       | 0.59 ± 0.10  | 0.78 ± 0.25  | 0.67 ± 0.38  |
| Salicylic acid                        | 2.26 ± 0.10         | 1.82 ± 0.25      | 1.77 ± 0.05  | 1.85 ± 0.46  | 2.06 ± 0.30       | 2.02 ± 0.14  | 1.91 ± 0.20  | 2.03 ± 0.33  |
| p-hydroxybenzoic acid                 | 6.51 ± 0.55         | 5.02 ± 0.43      | 5.86 ± 0.49  | 5.37 ± 0.99  | 5.52 ± 0.67       | 5.06 ± 0.40  | 5.78 ± 0.74  | 5.25 ± 0.72  |
| 2, 3-dihydroxybenzoic acid            | nd                  | nd               | nd           | nd           | 0.32 ± 0.02       | 0.30 ± 0.01  | 0.30 ± 0.01  | 0.30 ± 0.01  |
| 2, 4-dihydroxybenzoic acid            | nd                  | nd               | nd           | nd           | nd                | nd           | nd           | nd           |
| gentisic acid                         | nd                  | nd               | nd           | nd           | 32.56 ± 3.91      | 24.98 ± 1.66 | 33.48 ± 4.28 | 24.37 ± 2.40 |
| 2, 6-dihydroxybenzoic acid            | nd                  | nd               | nd           | nd           | nd                | nd           | nd           | nd           |
| protocatechuic acid                   | 13.38 ± 1.03        | 13.29 ± 1.03     | 16.37 ± 1.70 | 16.84 ± 2.16 | 17.93 ± 1.47      | 13.70 ± 1.25 | 16.83 ± 1.06 | 16.15 ± 0.47 |
| 2-methoxybenzoic acid                 | 3.39 ± 0.83         | nd               | nd           | nd           | nd                | nd           | nd           | nd           |
| 4-methoxybenzoic acid                 | nd                  | nd               | nd           | nd           | nd                | nd           | nd           | nd           |
| 3, 4, 5-trihydroxybenzoic acid        | 0.21 ± 0.13         | 0.24 ± 0.10      | 0.17 ± 0.07  | 0.22 ± 0.09  | 0.28 ± 0.02       | 0.30 ± 0.02  | 0.28 ± 0.01  | 0.29 ± 0.03  |
| Vanillic acid                         | 8.99 ± 1.55         | 8.40 ± 0.54      | 8.63 ± 0.46  | 8.48 ± 1.50  | 10.70 ± 1.49      | 8.33 ± 1.25  | 9.84 ± 0.74  | 9.45 ± 0.30  |
| 3, 5-dimethoxy-4-hydroxybenzoic acid  | 3.78 ± 0.70         | 3.70 ± 0.59      | 3.74 ± 0.36  | 3.98 ± 0.75  | 7.36 ± 1.16       | 5.32 ± 1.37  | 6.59 ± 0.45  | 6.47 ± 0.29  |
| p-Hydroxybenzaldehyde                 | 1.78 ± 0.26         | 1.45 ± 0.18      | 1.53 ± 0.09  | 1.59 ± 0.30  | 2.53 ± 0.28       | 1.69 ± 0.31  | 2.09 ± 0.08  | 2.20 ± 0.24  |
| protocatechualdehyde                  | 7.01 ± 1.15         | 7.28 ± 1.05      | 7.48 ± 0.31  | 7.50 ± 1.07  | 8.61 ± 0.77       | 7.08 ± 0.75  | 7.94 ± 0.30  | 7.18 ± 0.21  |
| 3, 4, 5--trihydroxybenzaldehyde       | nd                  | nd               | nd           | nd           | nd                | nd           | nd           | nd           |
| vanillin                              | 5.11 ± 0.70         | 5.11 ± 0.64      | 4.79 ± 0.48  | 4.83 ± 0.81  | 9.37 ± 1.05       | 7.38 ± 1.41  | 7.65 ± 0.49  | 8.05 ± 0.60  |
| 3, 5-dimethoxy-4-hydroxybenzaldehyde  | 6.20 ± 0.85         | 6.22 ± 0.63      | 6.64 ± 0.75  | 6.47 ± 0.80  | 15.83 ± 1.96      | 11.52 ± 2.28 | 13.24 ± 0.72 | 13.51 ± 0.62 |
| cinnamic acid                         | 0.09 ± 0.02         | 0.10 ± 0.02      | 0.08 ± 0.00  | 0.09 ± 0.03  | 0.19 ± 0.01       | 0.16 ± 0.01  | 0.17 ± 0.02  | 0.18 ± 0.02  |
| p-Coumaric acid                       | 6.72 ± 0.81         | 6.67 ± 0.41      | 7.01 ± 0.78  | 6.69 ± 1.04  | 7.99 ± 1.34       | 6.83 ± 1.03  | 6.91 ± 0.73  | 6.81 ± 0.51  |
| caffeic acid                          | 0.97 ± 0.05         | 0.83 ± 0.15      | 0.85 ± 0.01  | 0.86 ± 0.12  | 0.90 ± 0.10       | 0.88 ± 0.13  | 0.92 ± 0.13  | 0.85 ± 0.05  |
| ferulic acid                          | 9.67 ± 1.42         | 8.96 ± 1.06      | 9.08 ± 0.61  | 9.21 ± 0.81  | 9.65 ± 1.17       | 9.94 ± 0.61  | 10.05 ± 1.33 | 9.70 ± 0.92  |
| 3, 5-dimethoxy-4-hydroxycinnamic acid | 0.44 ± 0.07         | 0.45 ± 0.06      | 0.49 ± 0.03  | 0.49 ± 0.05  | nd                | nd           | nd           | nd           |
| 3-hydroxyphenylpropionic acid         | nd                  | nd               | nd           | nd           | nd                | nd           | nd           | nd           |
| Phloretic acid                        | nd                  | nd               | nd           | nd           | nd                | nd           | nd           | nd           |



|                                                              |             |             |             |             |             |             |             |             |
|--------------------------------------------------------------|-------------|-------------|-------------|-------------|-------------|-------------|-------------|-------------|
| 3-methoxy-4-hydroxyphenylpropionic acid                      | 0.90 ± 0.11 | 0.98 ± 0.17 | 0.98 ± 0.12 | 0.95 ± 0.22 | 0.90 ± 0.15 | 0.88 ± 0.07 | 0.97 ± 0.15 | 0.89 ± 0.10 |
| 4-hydroxyacetophenone                                        | 0.12 ± 0.02 | 0.09 ± 0.01 | 0.07 ± 0.01 | 0.08 ± 0.02 | 0.14 ± 0.01 | 0.11 ± 0.01 | 0.13 ± 0.01 | 0.13 ± 0.01 |
| 3-methoxy-4-hydroxyacetophenone                              | 0.39 ± 0.03 | 0.35 ± 0.03 | 0.34 ± 0.03 | 0.35 ± 0.02 | 0.49 ± 0.04 | 0.41 ± 0.05 | 0.47 ± 0.04 | 0.52 ± 0.03 |
| 3, 5-dimethoxy-4-hydroxyacetophenone                         | nd          | nd          | nd          | nd          | 0.58 ± 0.09 | 0.44 ± 0.08 | 0.52 ± 0.05 | 0.51 ± 0.02 |
| phenylacetic acid                                            | nd          |
| 4-hydroxyphenylacetic acid                                   | nd          | nd          | nd          | nd          | nd          | nd          | 2.27 ± 0.26 | 2.62 ± 0.28 |
| 3, 4-dihydroxyphenylacetic acid<br>(Homoprotocatechuic acid) | nd          | nd          | nd          | nd          | 8.73 ± 1.21 | 7.55 ± 1.15 | 8.05 ± 0.87 | 8.05 ± 0.57 |
| indole-3-acetic acid                                         | nd          |
| indole-3-carboxylic acid                                     | nd          |
| indole-4-propionic acid                                      | nd          |
| Chlorogenic acid                                             | nd          |
| 3-hydroxymandelic acid                                       | 2.48 ± 0.57 | 2.71 ± 0.12 | 3.04 ± 0.27 | 2.93 ± 0.44 | nd          | nd          | nd          | nd          |
| 3, 4-dihydroxymandelic acid                                  | nd          | nd          | 0.11 ± 0.10 | 0.06 ± 0.11 | nd          | nd          | nd          | nd          |
| 4-hydroxy-3-methoxy-mandelic acid                            | 0.97 ± 0.09 | 0.86 ± 0.19 | nd          | nd          | nd          | nd          | nd          | nd          |
| phenyllactic acid                                            | nd          |
| 4-hydroxyphenyllactic acid                                   | nd          | nd          | nd          | nd          | 0.56 ± 0.15 | 0.50 ± 0.04 | 0.54 ± 0.03 | 0.53 ± 0.08 |
| phenylpyruvic acid                                           | nd          | 0.35 ± 0.02 | 0.34 ± 0.01 | 0.39 ± 0.03 | 1.77 ± 0.22 | 1.09 ± 0.06 | 1.77 ± 0.23 | 2.25 ± 0.21 |
| ethylferulate                                                | nd          |
| catechin                                                     | nd          | nd          | nd          | 0.04 ± 0.06 | nd          | nd          | nd          | nd          |
| epicatechin                                                  | nd          |
| gallocatechin                                                | nd          |
| epigallocatechin                                             | nd          |
| isoliquiritigenin                                            | nd          |
| naringenin                                                   | nd          |
| kaempferol                                                   | nd          |
| quercetin                                                    | 0.07 ± 0.11 | 0.29 ± 0.03 | 0.28 ± 0.06 | 0.27 ± 0.02 | 0.08 ± 0.07 | 0.15 ± 0.02 | 0.15 ± 0.03 | 0.12 ± 0.00 |

|                       |                   |                   |                   |                  |                   |                   |                  |                  |
|-----------------------|-------------------|-------------------|-------------------|------------------|-------------------|-------------------|------------------|------------------|
| quercetin-3-glucoside | nd                | nd                | nd                | nd               | nd                | nd                | nd               | nd               |
| taxifolin             | $0.10 \pm 0.09$   | $0.06 \pm 0.10$   | $0.11 \pm 0.09$   | $0.14 \pm 0.01$  | nd                | $0.05 \pm 0.01$   | $0.05 \pm 0.02$  | nd               |
| biochanin a           | $0.07 \pm 0.01$   | $0.04 \pm 0.04$   | $0.07 \pm 0.00$   | $0.07 \pm 0.01$  | nd                | nd                | nd               | nd               |
| luteolin              | $0.58 \pm 0.14$   | $0.37 \pm 0.06$   | $0.41 \pm 0.08$   | $0.47 \pm 0.13$  | $0.20 \pm 0.01$   | $0.21 \pm 0.02$   | $0.20 \pm 0.01$  | $0.20 \pm 0.01$  |
| apigenin              | $0.17 \pm 0.03$   | $0.13 \pm 0.02$   | $0.13 \pm 0.02$   | $0.14 \pm 0.01$  | $0.08 \pm 0.00$   | $0.08 \pm 0.00$   | $0.08 \pm 0.00$  | $0.08 \pm 0.00$  |
| tyrosol               | nd                | nd                | nd                | nd               | nd                | nd                | nd               | nd               |
| hydroxytyrosol        | $0.06 \pm 0.00$   | $0.06 \pm 0.02$   | $0.08 \pm 0.01$   | $0.10 \pm 0.04$  | nd                | nd                | nd               | nd               |
| isorhamnetin          | nd                | nd                | $0.19 \pm 0.01$   | $0.17 \pm 0.01$  | nd                | nd                | nd               | nd               |
| rutin                 | nd                | nd                | nd                | nd               | nd                | nd                | nd               | nd               |
| vitexin               | $0.23 \pm 0.25$   | $0.05 \pm 0.01$   | nd                | $0.05 \pm 0.00$  | $0.04 \pm 0.04$   | $0.05 \pm 0.04$   | $0.04 \pm 0.04$  | $0.04 \pm 0.04$  |
| isovitexin            | $0.23 \pm 0.25$   | $0.05 \pm 0.01$   | nd                | $0.05 \pm 0.00$  | nd                | $0.02 \pm 0.04$   | nd               | nd               |
| hyperoside            | nd                | nd                | nd                | nd               | nd                | nd                | nd               | nd               |
| hesperitin            | nd                | nd                | nd                | nd               | nd                | nd                | nd               | nd               |
| ferulic dimer 8-5c    | nd                | nd                | nd                | nd               | $0.01 \pm 0.01$   | $0.01 \pm 0.02$   | nd               | nd               |
| secoisolariciresinol  | nd                | nd                | nd                | nd               | nd                | nd                | nd               | nd               |
| syringaresinol        | $72.55 \pm 16.63$ | $92.09 \pm 16.34$ | $89.99 \pm 13.29$ | $95.05 \pm 1.11$ | $82.46 \pm 10.68$ | $79.72 \pm 11.26$ | $73.49 \pm 7.69$ | $82.72 \pm 3.11$ |
| pinoresinol           | $0.27 \pm 0.03$   | $0.37 \pm 0.07$   | $0.35 \pm 0.04$   | $0.33 \pm 0.01$  | $0.17 \pm 0.04$   | $0.18 \pm 0.04$   | $0.16 \pm 0.02$  | $0.16 \pm 0.03$  |

| SET D<br>compounds name (mg/Kg)      | Initial matrix | First bioprocess |              |              |              | Second bioprocess |              |              |  |
|--------------------------------------|----------------|------------------|--------------|--------------|--------------|-------------------|--------------|--------------|--|
|                                      | Total content  |                  |              |              |              |                   |              |              |  |
|                                      | Raw            | EM_1             | BY_1         | EM+BY_1      | EM_2         | EC_2              | BY_2         | EC+BY_2      |  |
| benzoic acid                         | 5.77 ± 0.72    | 7.26 ± 0.60      | 12.47 ± 2.54 | 14.02 ± 0.97 | 5.16 ± 1.48  | 6.11 ± 0.85       | 15.20 ± 1.40 | 15.08 ± 1.64 |  |
| Salicylic acid                       | 25.59 ± 4.11   | 34.24 ± 4.65     | 34.13 ± 4.87 | 36.72 ± 2.11 | 36.74 ± 5.33 | 40.04 ± 1.11      | 43.14 ± 3.70 | 39.70 ± 1.86 |  |
| p-hydroxybenzoic acid                | 23.12 ± 2.71   | 26.73 ± 2.01     | 32.22 ± 4.46 | 39.26 ± 2.93 | 27.92 ± 4.24 | 32.00 ± 2.01      | 33.79 ± 3.64 | 31.15 ± 1.25 |  |
| 2, 3-dihydroxybenzoic acid           | nd             | nd               | nd           | nd           | 1.19 ± 0.05  | 1.33 ± 0.19       | 1.23 ± 0.11  | 1.12 ± 0.06  |  |
| 2, 4-dihydroxybenzoic acid           | nd             | nd               | nd           | nd           | 0.66 ± 0.03  | 0.52 ± 0.04       | 0.19 ± 0.32  | 0.35 ± 0.30  |  |
| gentisic acid                        | nd             | nd               | nd           | nd           | 34.70 ± 5.11 | 30.41 ± 2.62      | 38.34 ± 6.90 | 32.50 ± 5.95 |  |
| 2, 6-dihydroxybenzoic acid           | 0.10 ± 0.03    | 0.15 ± 0.02      | 0.16 ± 0.04  | 0.16 ± 0.01  | 0.30 ± 0.02  | 0.34 ± 0.02       | 0.31 ± 0.03  | 0.28 ± 0.02  |  |
| protocatechuic acid                  | 43.66 ± 7.13   | 32.09 ± 1.75     | 36.67 ± 4.27 | 40.18 ± 4.76 | 56.25 ± 3.75 | 49.01 ± 1.85      | 58.26 ± 3.07 | 49.44 ± 3.05 |  |
| 2-methoxybenzoic acid                | 3.39 ± 0.83    | nd               | nd           | nd           | nd           | nd                | nd           | nd           |  |
| 4-methoxybenzoic acid                | nd             | nd               | nd           | nd           | 1.05 ± 0.09  | 0.54 ± 0.06       | 0.97 ± 0.11  | 0.67 ± 0.36  |  |
| 3, 4, 5-trihydroxybenzoic acid       | 0.30 ± 0.19    | 0.24 ± 0.10      | 0.17 ± 0.07  | 0.22 ± 0.09  | 0.64 ± 0.01  | 0.55 ± 0.04       | 0.92 ± 0.05  | 0.78 ± 0.07  |  |
| Vanillic acid                        | 14.97 ± 0.93   | 19.91 ± 1.33     | 21.08 ± 3.04 | 22.80 ± 1.53 | 22.77 ± 2.51 | 21.67 ± 0.61      | 24.30 ± 2.10 | 22.03 ± 0.49 |  |
| 3, 5-dimethoxy-4-hydroxybenzoic acid | 5.22 ± 0.49    | 5.55 ± 0.75      | 5.68 ± 0.78  | 5.99 ± 0.93  | 9.76 ± 1.30  | 7.91 ± 1.34       | 9.30 ± 0.59  | 8.86 ± 0.25  |  |
| p-Hydroxybenzaldehyde                | 14.22 ± 1.64   | 14.77 ± 0.68     | 9.64 ± 2.04  | 9.89 ± 0.73  | 18.13 ± 1.61 | 16.58 ± 1.84      | 18.39 ± 1.29 | 16.63 ± 1.39 |  |
| protocatechualdehyde                 | 44.24 ± 5.40   | 28.81 ± 1.90     | 29.09 ± 3.63 | 32.33 ± 3.78 | 41.75 ± 2.31 | 37.38 ± 1.06      | 42.02 ± 3.29 | 38.43 ± 2.04 |  |
| 3, 4, 5--trihydroxybenzaldehyde      | nd             | nd               | nd           | nd           | 2.03 ± 2.78  | 0.37 ± 0.03       | 0.37 ± 0.02  | 0.44 ± 0.18  |  |
| vanillin                             | 16.67 ± 0.65   | 16.34 ± 0.73     | 14.28 ± 2.76 | 14.87 ± 1.11 | 27.71 ± 2.08 | 25.77 ± 2.58      | 27.42 ± 2.26 | 24.99 ± 1.29 |  |
| 3, 5-dimethoxy-4-hydroxybenzaldehyde | 10.63 ± 0.71   | 10.27 ± 0.51     | 10.46 ± 1.52 | 10.43 ± 1.06 | 24.31 ± 2.02 | 19.65 ± 2.58      | 22.17 ± 1.14 | 21.32 ± 0.71 |  |
| cinnamic acid                        | 0.34 ± 0.06    | 0.43 ± 0.04      | 0.47 ± 0.04  | 0.47 ± 0.09  | 0.95 ± 0.13  | 0.94 ± 0.06       | 1.02 ± 0.08  | 0.92 ± 0.01  |  |

|                                                              |               |              |              |              |              |              |              |               |
|--------------------------------------------------------------|---------------|--------------|--------------|--------------|--------------|--------------|--------------|---------------|
| p-Coumaric acid                                              | 53.71 ± 10.72 | 43.56 ± 2.39 | 41.60 ± 7.79 | 45.66 ± 7.02 | 85.94 ± 6.68 | 89.09 ± 4.22 | 90.73 ± 8.69 | 79.83 ± 10.05 |
| caffeic acid                                                 | 2.03 ± 0.49   | 3.02 ± 0.38  | 2.93 ± 0.37  | 3.28 ± 0.31  | 6.76 ± 0.87  | 7.93 ± 1.32  | 7.70 ± 0.76  | 7.51 ± 0.47   |
| ferulic acid                                                 | 16.30 ± 0.47  | 26.51 ± 3.45 | 32.60 ± 4.16 | 31.90 ± 1.63 | 39.81 ± 6.60 | 47.59 ± 2.27 | 52.04 ± 5.09 | 49.22 ± 0.87  |
| 3, 5-dimethoxy-4-hydroxycinnamic acid                        | 0.44 ± 0.07   | 0.45 ± 0.06  | 0.49 ± 0.03  | 0.49 ± 0.05  | 0.33 ± 0.02  | 0.37 ± 0.01  | 0.39 ± 0.01  | 0.36 ± 0.03   |
| 3-hydroxyphenylpropionic acid                                | 1.27 ± 0.28   | 1.38 ± 0.20  | 1.38 ± 0.21  | 1.60 ± 0.11  | 1.08 ± 0.29  | 1.33 ± 0.03  | 1.38 ± 0.16  | 1.28 ± 0.01   |
| Phloretic acid                                               | 3.14 ± 0.32   | nd           | nd           | 2.42 ± 0.30  | 9.31 ± 1.43  | 10.63 ± 0.45 | 11.36 ± 1.44 | 9.84 ± 0.75   |
| 3-methoxy-4-hydroxyphenylpropionic acid                      | 0.90 ± 0.11   | 1.20 ± 0.19  | 1.21 ± 0.09  | 1.25 ± 0.18  | 1.19 ± 0.21  | 1.25 ± 0.05  | 1.29 ± 0.16  | 1.27 ± 0.08   |
| 4-hydroxyacetophenone                                        | 0.20 ± 0.00   | 0.21 ± 0.02  | 0.19 ± 0.05  | 0.22 ± 0.05  | 0.38 ± 0.01  | 0.36 ± 0.02  | 0.38 ± 0.02  | 0.36 ± 0.01   |
| 3-methoxy-4-hydroxyacetophenone                              | 0.46 ± 0.02   | 0.50 ± 0.04  | 0.50 ± 0.07  | 0.52 ± 0.03  | 0.86 ± 0.04  | 0.78 ± 0.06  | 0.85 ± 0.05  | 0.86 ± 0.03   |
| 3, 5-dimethoxy-4-hydroxyacetophenone                         | nd            | nd           | nd           | nd           | 0.77 ± 0.09  | 0.74 ± 0.13  | 0.75 ± 0.08  | 0.71 ± 0.02   |
| phenylacetic acid                                            | 0.32 ± 0.01   | 0.81 ± 0.10  | 5.34 ± 0.75  | 5.75 ± 0.28  | nd           | nd           | nd           | nd            |
| 4-hydroxyphenylacetic acid                                   | nd            | nd           | nd           | nd           | nd           | nd           | 4.51 ± 0.56  | 5.52 ± 0.28   |
| 3, 4-dihydroxyphenylacetic acid<br>(Homoprotocatechuic acid) | nd            | nd           | nd           | nd           | 19.79 ± 2.51 | 20.28 ± 1.07 | 22.07 ± 1.76 | 20.31 ± 0.41  |
| indole-3-acetic acid                                         | 0.08 ± 0.04   | nd           | nd           | 0.12 ± 0.01  | 0.37 ± 0.02  | 0.37 ± 0.01  | 0.51 ± 0.03  | 0.46 ± 0.02   |
| indole-3-carboxylic acid                                     | 1.28 ± 0.34   | 1.37 ± 0.41  | 1.32 ± 0.14  | 1.67 ± 0.24  | 2.37 ± 0.40  | 2.50 ± 0.23  | 2.71 ± 0.09  | 2.44 ± 0.24   |
| indole-4-propionic acid                                      | nd            | nd           | nd           | nd           | 0.14 ± 0.01  | 0.14 ± 0.01  | 0.14 ± 0.01  | nd            |
| Chlorogenic acid                                             | 0.07 ± 0.12   | nd           | nd           | nd           | 0.63 ± 0.11  | 0.69 ± 0.16  | 0.57 ± 0.12  | 0.35 ± 0.02   |
| 3-hydroxymandelic acid                                       | 3.98 ± 1.45   | 5.03 ± 0.17  | 4.48 ± 0.11  | 4.87 ± 0.67  | nd           | nd           | nd           | nd            |
| 3, 4-dihydroxymandelic acid                                  | 0.63 ± 0.07   | 0.40 ± 0.24  | 0.26 ± 0.12  | 0.40 ± 0.33  | nd           | nd           | nd           | nd            |
| 4-hydroxy-3-methoxy-mandelic acid                            | 0.97 ± 0.09   | 0.86 ± 0.19  | nd           | nd           | nd           | nd           | nd           | nd            |
| phenyllactic acid                                            | nd            | 0.05 ± 0.02  | 0.83 ± 0.12  | 0.99 ± 0.08  | nd           | nd           | 0.27 ± 0.06  | 0.26 ± 0.03   |
| 4-hydroxyphenyllactic acid                                   | 1.20 ± 0.46   | nd           | nd           | nd           | 0.56 ± 0.15  | 0.50 ± 0.04  | 1.02 ± 0.05  | 0.92 ± 0.11   |

|                       |               |               |               |              |               |               |              |              |
|-----------------------|---------------|---------------|---------------|--------------|---------------|---------------|--------------|--------------|
| phenylpyruvic acid    | nd            | 0.73 ± 0.06   | 1.22 ± 0.19   | 1.58 ± 0.05  | 2.65 ± 0.25   | 2.11 ± 0.17   | 2.61 ± 0.35  | 3.20 ± 0.33  |
| ethylferulate         | nd            | nd            | nd            | nd           | 0.21 ± 0.02   | 0.20 ± 0.02   | 0.20 ± 0.01  | 0.20 ± 0.00  |
| catechin              | 1.72 ± 1.49   | 2.63 ± 1.06   | 5.57 ± 2.65   | 3.95 ± 2.36  | 3.35 ± 1.72   | 10.61 ± 2.23  | 9.63 ± 2.35  | 6.26 ± 1.20  |
| epicatechin           | nd            | nd            | nd            | nd           | 0.18 ± 0.32   | 1.35 ± 0.42   | 1.06 ± 0.26  | 0.80 ± 0.25  |
| galocatechin          | nd            | 0.90 ± 0.22   | 0.83 ± 0.60   | 0.64 ± 0.27  | 0.20 ± 0.04   | 0.52 ± 0.27   | 0.65 ± 0.36  | 0.25 ± 0.07  |
| epigallocatechin      | nd            | 0.35 ± 0.07   | 0.22 ± 0.08   | 0.25 ± 0.12  | nd            | nd            | nd           | nd           |
| isoliquiritigenin     | 0.08 ± 0.00   | nd            | nd            | nd           | nd            | nd            | nd           | nd           |
| naringenin            | nd            | nd            | 0.00 ± 0.01   | 0.01 ± 0.00  | nd            | nd            | nd           | nd           |
| kaempferol            | nd            | nd            | nd            | nd           | nd            | 0.15 ± 0.00   | 0.16 ± 0.01  | 0.13 ± 0.02  |
| quercetin             | 0.49 ± 0.29   | 1.19 ± 0.21   | 1.44 ± 0.39   | 1.47 ± 0.40  | 0.96 ± 0.12   | 1.42 ± 0.20   | 1.34 ± 0.39  | 1.18 ± 0.11  |
| quercetin-3-glucoside | 0.54 ± 0.06   | 0.35 ± 0.06   | 0.33 ± 0.03   | 0.32 ± 0.03  | 0.19 ± 0.03   | 0.18 ± 0.04   | 0.18 ± 0.02  | 0.16 ± 0.03  |
| taxifolin             | 0.31 ± 0.27   | 0.41 ± 0.13   | 0.47 ± 0.17   | 0.49 ± 0.10  | 0.62 ± 0.15   | 0.96 ± 0.09   | 1.07 ± 0.08  | 0.72 ± 0.11  |
| biochanin a           | 0.16 ± 0.01   | 0.47 ± 0.04   | 0.47 ± 0.09   | 0.53 ± 0.02  | nd            | nd            | nd           | nd           |
| luteolin              | 1.35 ± 0.11   | 3.71 ± 0.52   | 3.81 ± 0.76   | 4.42 ± 0.15  | 3.35 ± 0.81   | 3.67 ± 1.23   | 4.16 ± 0.38  | 3.89 ± 0.75  |
| apigenin              | 0.41 ± 0.02   | 1.19 ± 0.10   | 1.02 ± 0.12   | 1.24 ± 0.16  | 1.21 ± 0.28   | 1.33 ± 0.19   | 1.21 ± 0.10  | 1.36 ± 0.17  |
| tyrosol               | 0.02 ± 0.03   | nd            | nd            | nd           | nd            | nd            | nd           | nd           |
| hydroxytyrosol        | 0.18 ± 0.03   | 0.14 ± 0.02   | 0.16 ± 0.05   | 0.16 ± 0.00  | nd            | nd            | 0.02 ± 0.01  | 0.04 ± 0.01  |
| isorhamnetin          | 0.22 ± 0.03   | 0.54 ± 0.07   | 0.78 ± 0.09   | 0.74 ± 0.02  | 0.41 ± 0.09   | 0.63 ± 0.26   | 0.64 ± 0.07  | 0.67 ± 0.06  |
| rutin                 | 0.21 ± 0.01   | nd            | nd            | nd           | nd            | 0.04 ± 0.07   | nd           | nd           |
| vitexin               | 0.30 ± 0.25   | 0.18 ± 0.03   | 0.16 ± 0.10   | 0.20 ± 0.01  | 0.33 ± 0.14   | 0.25 ± 0.12   | 0.20 ± 0.05  | 0.23 ± 0.11  |
| isovitexin            | 0.30 ± 0.25   | 0.18 ± 0.03   | 0.16 ± 0.10   | 0.20 ± 0.01  | 0.25 ± 0.20   | 0.17 ± 0.05   | 0.15 ± 0.01  | 0.10 ± 0.09  |
| hyperoside            | 0.58 ± 0.12   | 0.32 ± 0.07   | 0.31 ± 0.05   | 0.27 ± 0.03  | 0.22 ± 0.03   | 0.20 ± 0.05   | 0.19 ± 0.01  | 0.18 ± 0.01  |
| hesperitin            | nd            | nd            | nd            | nd           | nd            | nd            | nd           | 0.01 ± 0.00  |
| ferulic dimer 8-5c    | nd            | 0.49 ± 0.06   | 0.30 ± 0.06   | 0.36 ± 0.04  | 0.01 ± 0.01   | 0.01 ± 0.02   | nd           | nd           |
| secoisolariciresinol  | 0.21 ± 0.07   | 0.22 ± 0.01   | 0.18 ± 0.04   | 0.23 ± 0.06  | 0.20 ± 0.01   | 0.13 ± 0.01   | 0.19 ± 0.07  | 0.16 ± 0.09  |
| syringaresinol        | 72.55 ± 16.63 | 92.09 ± 16.34 | 89.99 ± 13.29 | 95.05 ± 1.11 | 83.57 ± 10.53 | 82.53 ± 13.33 | 74.74 ± 5.75 | 84.99 ± 4.65 |
| pinoresinol           | 0.27 ± 0.03   | 1.04 ± 0.15   | 1.02 ± 0.17   | 0.99 ± 0.12  | 0.83 ± 0.14   | 0.93 ± 0.11   | 1.12 ± 0.04  | 1.04 ± 0.06  |

The following compounds were not detected or below detection limit in all the sample analysed: 3-hydroxybenzoic acid, 3, 5-dihydroxybenzoic acid, 3-, ethoxybenzoic acid, 3, 4-dimethoxybenzoic acid, 4-methoxy-3-hydroxybenzaldehyde, 2-hydroxybenzyl alcohol, 2-hydroxycinnamic acid, 3-hydroxycinnamic acid, 3-methoxycinnamic acid, 4-methoxycinnamic acid, 3, 4-dimethoxycinnamic acid, 3, 4, 5-trimethoxycinnamic acid, 2-hydroxyphenylpropionic acid, 4-hydroxyphenylpropionic acid, 3-methoxyphenylpropionic acid, 1, 2-dihydroxybenzene, 1, 3-dihydroxybenzen, 1, 2, 3-trihydroxybenzene, 3-hydroxyphenylacetic acid, 4-methoxyphenylacetic acid, 3-methoxy-4-hydroxyphenylacetic acid, mandelic acid, 4-hydroxymandelic acid, o-Hydroxyhippuric acid, phenylpropionic acid, epigallocatechin gallate, myricetin, scopoletin, umbelliferone, 7,8-dihydroxy-6-methyl coumarin, hesperidin, quercitrin, didymin, phloridzin, formononetin, phloretin, eriocitrin, naringin, morin, genistein, neohesperidin, poncirin, daidzein, galangin, equol, fisetin, neoeriocitrin, gossypin Resveratrol, ferulic dimer 5-5, ferulic dimer 8-8c, hydrogenated ferulic dimer h5-5, ellagic acid, enterodiol, lariciresinol, hydroxymatairesinol, matairesinol, enterolactone.

Where nd: were not detected or below detection limit.

Table S2. The metabolites with inconsistent change as average values of concentration ( $\mu\text{g/ml}$ ) from the three donors for the microbial metabolites. The raw (set 1) and enzyme-treated hempseed screenings (EM\_1 and EC\_2) set 2 and set 3, as well as their corresponding in vitro-pre-digested samples were inoculated with faecal slurries from three donors (Donor 1, 2 and 3) at 0, 24, 48 and 72 hours. Blank samples were inoculated sterile PBS without faecal slurry. Values were the mean of three donors, and each donor had three replicates.

| Set 1<br>compound (ng/ml)             | Raw_<br>0h | Raw_2<br>4h | Raw_4<br>8h | Raw_7<br>2h | Raw_<br>0h<br>blank | Raw_7<br>2h<br>blank | Raw+ivgd_<br>0h | Raw+ivgd_2<br>4h | Raw+ivgd_4<br>8h | Raw+ivgd_7<br>2h | Raw+ivgd_<br>0h blank | Raw+ivgd_7<br>2h blank |
|---------------------------------------|------------|-------------|-------------|-------------|---------------------|----------------------|-----------------|------------------|------------------|------------------|-----------------------|------------------------|
| phenylpropionic acid                  | 41.64      | 76.49       | 83.54       | 86.05       | 41.76               | 45.67                | 42.05           | 70.63            | 97.66            | 106.11           | 39.56                 | 41.01                  |
| phenylacetic acid                     | 8.51       | 31.68       | 20.38       | 29.17       | 7.30                | 10.53                | 7.75            | 29.70            | 52.12            | 72.81            | 6.98                  | 7.32                   |
| 4-<br>hydroxyphenylacetic<br>acid     | 3.62       | 12.99       | 11.08       | 16.35       | 3.53                | 6.91                 | 3.57            | 18.02            | 14.60            | 20.07            | 3.30                  | 3.70                   |
| benzoic acid                          | 1.42       | 1.67        | 1.68        | 1.72        | 1.46                | 1.53                 | 1.51            | 1.58             | 1.60             | 1.73             | 1.42                  | 1.46                   |
| 3-<br>hydroxyphenylpropio<br>nic acid | 1.07       | 5.41        | 6.03        | 6.68        | 0.63                | 0.77                 | 0.95            | 4.86             | 6.31             | 7.56             | 0.60                  | 0.63                   |
| 3-<br>hydroxyphenylacetic<br>acid     | 0.56       | 0.62        | 0.72        | 0.92        | 0.47                | 0.62                 | 0.51            | 0.53             | 0.59             | 0.76             | 0.48                  | 0.51                   |
| indole 3-propionic<br>acid            | 0.40       | 0.77        | 0.81        | 0.85        | 0.41                | 0.65                 | 0.40            | 0.83             | 0.86             | 0.94             | 0.40                  | 0.39                   |
| p-hydroxybenzoic<br>acid              | 0.23       | 0.32        | 0.35        | 0.40        | 0.22                | 0.29                 | 0.19            | 0.23             | 0.27             | 0.32             | 0.18                  | 0.19                   |
| phenyllactic acid                     | 0.19       | 0.58        | 0.16        | 0.18        | 0.15                | 0.13                 | 0.19            | 0.75             | 0.51             | 0.44             | 0.14                  | 0.32                   |
| 1, 2-<br>dihydroxybenzene             | 0.18       | 0.40        | 0.44        | 0.60        | 0.16                | 0.27                 | 0.17            | 0.24             | 0.27             | 0.43             | 0.12                  | 0.15                   |
| 3-hydroxymandelic<br>acid             | 0.15       | 0.17        | 0.17        | 0.15        | 0.16                | 0.15                 | 0.08            | 0.08             | 0.09             | 0.08             | 0.07                  | 0.06                   |
| 2-<br>hydroxyphenylpropio<br>nic acid | 0.11       | 0.11        | 0.12        | 0.13        | 0.09                | 0.10                 | 0.10            | 0.11             | 0.14             | 0.15             | 0.09                  | 0.11                   |
| 4-<br>hydroxyphenyllactic<br>acid     | 0.09       | 0.20        | 0.13        | 0.10        | 0.07                | 0.00                 | 0.09            | 0.16             | 0.10             | 0.10             | 0.05                  | 0.06                   |

|                                         |      |       |      |      |      |      |      |       |      |      |      |      |
|-----------------------------------------|------|-------|------|------|------|------|------|-------|------|------|------|------|
| Tyrosol                                 | 0.06 | 0.49  | 0.62 | 0.57 | 0.04 | 0.18 | 0.06 | 0.46  | 0.59 | 0.56 | 0.04 | 0.09 |
| Indole                                  | 0.04 | 0.09  | 0.19 | 0.16 | 0.03 | 0.03 | 0.00 | 0.09  | 0.15 | 0.19 | 0.00 | 0.00 |
| gentisic acid                           | 0.04 | 0.27  | 0.26 | 0.26 | 0.00 | 0.00 | 0.00 | 0.06  | 0.06 | 0.07 | 0.00 | 0.00 |
| Indole-3-carboxylic acid                | 0.01 | 0.25  | 0.50 | 0.60 | 0.00 | 0.10 | 0.00 | 0.23  | 0.41 | 0.52 | 0.00 | 0.00 |
| 2-hydroxybenzyl alcohol                 | 0.00 | 0.02  | 0.02 | 0.02 | 0.00 | 0.01 | 0.00 | 0.00  | 0.00 | 0.00 | 0.00 | 0.00 |
| Enterodiol                              | 0.00 | 0.01  | 0.01 | 0.01 | 0.00 | 0.00 | 0.00 | 0.00  | 0.00 | 0.00 | 0.00 | 0.00 |
| Hydroxytyrosol                          | 0.00 | 0.03  | 0.06 | 0.05 | 0.00 | 0.00 | 0.00 | 0.02  | 0.05 | 0.04 | 0.00 | 0.00 |
| 4-hydroxyphenylpropionic acid           | 0.00 | 12.99 | 7.15 | 7.16 | 0.00 | 1.00 | 0.00 | 45.70 | 3.59 | 4.60 | 0.00 | 0.00 |
| I3-Acrylic                              | 0.00 | 0.01  | 0.00 | 0.00 | 0.00 | 0.00 | 0.00 | 0.01  | 0.01 | 0.00 | 0.00 | 0.00 |
| 1, 3-dihydroxybenzene                   | 0.02 | 0.02  | 0.02 | 0.02 | 0.01 | 0.02 | 0.01 | 0.02  | 0.02 | 0.02 | 0.01 | 0.01 |
| deoxycholic acid                        | 2.18 | 1.04  | 0.91 | 1.01 | 0.00 | 0.00 | 2.57 | 1.53  | 1.28 | 1.14 | 0.00 | 0.00 |
| Lithocholic acid                        | 1.11 | 0.42  | 0.60 | 0.55 | 0.28 | 0.18 | 1.00 | 0.64  | 0.69 | 0.62 | 0.00 | 0.00 |
| I3-Pyruvic                              | 0.68 | 0.25  | 0.09 | 0.17 | 0.50 | 0.12 | 0.74 | 0.27  | 0.23 | 0.25 | 0.54 | 1.39 |
| protocatechuic acid                     | 0.61 | 0.29  | 0.14 | 0.11 | 0.62 | 0.45 | 0.27 | 0.15  | 0.12 | 0.13 | 0.24 | 0.32 |
| 2, 3-dihydroxybenzoic acid              | 0.53 | 0.20  | 0.18 | 0.15 | 0.23 | 0.17 | 0.25 | 0.17  | 0.16 | 0.15 | 0.22 | 0.20 |
| 3-methoxy-4-hydroxyphenylpropionic acid | 0.52 | 0.00  | 0.00 | 0.00 | 0.46 | 0.29 | 0.48 | 0.00  | 0.00 | 0.00 | 0.43 | 0.44 |
| Indole-3- acetic acid                   | 0.45 | 0.42  | 0.44 | 0.46 | 0.47 | 0.48 | 0.46 | 0.39  | 0.41 | 0.48 | 0.46 | 0.49 |
| phenylpyruvic acid                      | 0.36 | 0.11  | 0.04 | 0.02 | 0.31 | 0.21 | 0.37 | 0.11  | 0.04 | 0.03 | 0.33 | 0.68 |
| protocatechualdehyde                    | 0.23 | 0.03  | 0.02 | 0.01 | 0.27 | 0.09 | 0.14 | 0.01  | 0.01 | 0.00 | 0.14 | 0.13 |
| 3, 4-dihydroxyphenylacetic acid         | 0.23 | 0.00  | 0.00 | 0.00 | 0.17 | 0.07 | 0.17 | 0.02  | 0.00 | 0.00 | 0.11 | 0.09 |
| Vanillic acid                           | 0.20 | 0.10  | 0.05 | 0.06 | 0.18 | 0.14 | 0.18 | 0.09  | 0.06 | 0.05 | 0.16 | 0.13 |



|                                      |      |      |      |      |      |      |      |      |      |      |      |      |
|--------------------------------------|------|------|------|------|------|------|------|------|------|------|------|------|
| 3, 4, 5-trihydroxybenzoic acid       | 0.19 | 0.00 | 0.00 | 0.00 | 0.08 | 0.02 | 0.03 | 0.00 | 0.00 | 0.00 | 0.00 | 0.08 |
| p-Hydroxybenzaldehyde                | 0.18 | 0.01 | 0.01 | 0.01 | 0.19 | 0.10 | 0.19 | 0.01 | 0.00 | 0.00 | 0.18 | 0.17 |
| 3-hydroxybenzoic acid                | 0.18 | 0.16 | 0.16 | 0.17 | 0.17 | 0.19 | 0.16 | 0.14 | 0.14 | 0.17 | 0.16 | 0.17 |
| Syringaresinol                       | 0.18 | 0.00 | 0.00 | 0.00 | 0.24 | 0.00 | 0.00 | 0.00 | 0.00 | 0.00 | 0.15 | 0.19 |
| Vitexin/Isovitexin                   | 0.15 | 0.00 | 0.00 | 0.00 | 0.17 | 0.01 | 0.09 | 0.00 | 0.00 | 0.00 | 0.08 | 0.08 |
| ferulic acid                         | 0.14 | 0.00 | 0.00 | 0.00 | 0.09 | 0.05 | 0.08 | 0.00 | 0.00 | 0.00 | 0.09 | 0.09 |
| Catechin                             | 0.14 | 0.01 | 0.00 | 0.00 | 0.14 | 0.16 | 0.07 | 0.00 | 0.01 | 0.01 | 0.07 | 0.11 |
| Chlorogenic acid                     | 0.14 | 0.00 | 0.00 | 0.00 | 0.01 | 0.00 | 0.01 | 0.00 | 0.00 | 0.00 | 0.01 | 0.00 |
| Enterolactone                        | 0.13 | 0.13 | 0.14 | 0.16 | 0.11 | 0.11 | 0.13 | 0.13 | 0.15 | 0.16 | 0.12 | 0.13 |
| 3, 5-dimethoxy-4-hydroxybenzoic acid | 0.13 | 0.01 | 0.00 | 0.00 | 0.13 | 0.08 | 0.11 | 0.01 | 0.01 | 0.02 | 0.11 | 0.08 |
| 2, 6-dihydroxybenzoic acid           | 0.13 | 0.04 | 0.04 | 0.04 | 0.04 | 0.04 | 0.04 | 0.04 | 0.04 | 0.04 | 0.04 | 0.04 |
| vanillin                             | 0.13 | 0.00 | 0.00 | 0.00 | 0.13 | 0.07 | 0.11 | 0.00 | 0.00 | 0.00 | 0.11 | 0.11 |
| Fisetin                              | 0.08 | 0.06 | 0.07 | 0.06 | 0.06 | 0.07 | 0.07 | 0.06 | 0.06 | 0.06 | 0.06 | 0.06 |
| 3, 5-dimethoxy-4-hydroxybenzaldehyde | 0.07 | 0.00 | 0.00 | 0.00 | 0.07 | 0.03 | 0.06 | 0.00 | 0.00 | 0.00 | 0.06 | 0.06 |
| l3-Carboxaldehyde                    | 0.06 | 0.03 | 0.02 | 0.02 | 0.06 | 0.03 | 0.06 | 0.03 | 0.02 | 0.03 | 0.06 | 0.06 |
| Epicatechin                          | 0.05 | 0.01 | 0.03 | 0.02 | 0.05 | 0.06 | 0.02 | 0.00 | 0.02 | 0.01 | 0.02 | 0.04 |
| caffeic acid                         | 0.03 | 0.00 | 0.00 | 0.00 | 0.01 | 0.00 | 0.02 | 0.00 | 0.00 | 0.00 | 0.01 | 0.02 |
| Luteolin                             | 0.03 | 0.00 | 0.00 | 0.00 | 0.01 | 0.00 | 0.02 | 0.00 | 0.00 | 0.00 | 0.00 | 0.01 |
| Hyperoside                           | 0.02 | 0.00 | 0.00 | 0.00 | 0.04 | 0.00 | 0.01 | 0.00 | 0.00 | 0.00 | 0.02 | 0.00 |
| Quercetin-3-Glucoside                | 0.02 | 0.00 | 0.00 | 0.00 | 0.04 | 0.00 | 0.01 | 0.00 | 0.00 | 0.00 | 0.02 | 0.00 |
| 3-methoxy-4-hydroxyacetophenone      | 0.02 | 0.00 | 0.00 | 0.00 | 0.02 | 0.01 | 0.01 | 0.00 | 0.00 | 0.00 | 0.01 | 0.02 |

[illegible]

|                  |      |      |      |      |      |      |      |      |      |      |      |      |
|------------------|------|------|------|------|------|------|------|------|------|------|------|------|
| Epigallocatechin | 0.00 | 0.00 | 0.00 | 0.00 | 0.00 | 0.00 | 0.01 | 0.00 | 0.00 | 0.00 | 0.02 | 0.00 |
|------------------|------|------|------|------|------|------|------|------|------|------|------|------|

| Set 2<br>compound (ng/ml)             | EM_1<br>_0h | EM_1_<br>24h | EM_1_<br>48h | EM_1_<br>72h | EM_1<br>_0h<br>blank | EM_1_<br>72h<br>blank | EM_1+ivg<br>d_0h | EM_1+ivgd<br>_24h | EM_1+ivgd<br>_48h | EM_1+ivgd<br>_72h | EM_1+ivg<br>d_0h<br>blank | EM_1+ivgd<br>_72h blank |
|---------------------------------------|-------------|--------------|--------------|--------------|----------------------|-----------------------|------------------|-------------------|-------------------|-------------------|---------------------------|-------------------------|
| phenylpropionic acid                  | 39.90       | 74.34        | 85.99        | 90.64        | 40.17                | 41.32                 | 41.44            | 76.13             | 87.80             | 92.40             | 40.58                     | 40.11                   |
| phenylacetic acid                     | 6.90        | 28.48        | 54.06        | 57.69        | 6.94                 | 8.72                  | 7.26             | 33.78             | 62.41             | 75.85             | 6.98                      | 7.25                    |
| 4-hydroxyphenylacetic<br>acid         | 3.53        | 14.66        | 11.70        | 16.35        | 3.43                 | 5.04                  | 3.49             | 14.87             | 13.07             | 24.22             | 3.48                      | 3.52                    |
| benzoic acid                          | 1.45        | 1.61         | 1.57         | 1.65         | 1.44                 | 1.47                  | 1.49             | 1.68              | 1.63              | 1.66              | 1.45                      | 1.45                    |
| 3-<br>hydroxyphenylpropion<br>ic acid | 0.93        | 4.99         | 5.63         | 6.62         | 0.59                 | 0.69                  | 0.91             | 5.03              | 5.92              | 6.39              | 0.60                      | 0.62                    |
| 3-hydroxyphenylacetic<br>acid         | 0.47        | 0.56         | 0.56         | 0.79         | 0.49                 | 0.63                  | 0.50             | 0.58              | 0.68              | 0.70              | 0.48                      | 0.55                    |
| indole 3-propionic acid               | 0.40        | 0.84         | 0.81         | 0.91         | 0.40                 | 0.40                  | 0.40             | 0.85              | 0.88              | 0.92              | 0.40                      | 0.39                    |
| p-hydroxybenzoic acid                 | 0.21        | 0.31         | 0.33         | 0.37         | 0.21                 | 0.24                  | 0.19             | 0.27              | 0.30              | 0.32              | 0.18                      | 0.18                    |
| phenyllactic acid                     | 0.18        | 1.03         | 0.93         | 0.49         | 0.15                 | 0.56                  | 0.18             | 0.67              | 0.46              | 0.51              | 0.14                      | 0.21                    |
| 1, 2-dihydroxybenzene                 | 0.18        | 0.32         | 0.39         | 0.56         | 0.15                 | 0.19                  | 0.17             | 0.25              | 0.27              | 0.42              | 0.14                      | 0.14                    |
| 3-hydroxymandelic<br>acid             | 0.17        | 0.18         | 0.17         | 0.12         | 0.17                 | 0.13                  | 0.15             | 0.14              | 0.11              | 0.12              | 0.13                      | 0.11                    |
| 2-<br>hydroxyphenylpropion<br>ic acid | 0.10        | 0.10         | 0.11         | 0.12         | 0.08                 | 0.11                  | 0.10             | 0.11              | 0.12              | 0.13              | 0.10                      | 0.10                    |
| 4-hydroxyphenyllactic<br>acid         | 0.08        | 0.15         | 0.08         | 0.10         | 0.04                 | 0.08                  | 0.09             | 0.22              | 0.13              | 0.05              | 0.05                      | 0.04                    |
| Tyrosol                               | 0.04        | 0.51         | 0.61         | 0.54         | 0.04                 | 0.14                  | 0.05             | 0.52              | 0.52              | 0.55              | 0.04                      | 0.05                    |
| Indole                                | 0.03        | 0.11         | 0.19         | 0.23         | 0.01                 | 0.03                  | 0.04             | 0.11              | 0.21              | 0.25              | 0.04                      | 0.00                    |
| gentisic acid                         | 0.02        | 0.19         | 0.17         | 0.18         | 0.00                 | 0.00                  | 0.00             | 0.07              | 0.06              | 0.06              | 0.00                      | 0.00                    |

|                                         |      |       |      |      |      |      |      |       |      |      |      |      |
|-----------------------------------------|------|-------|------|------|------|------|------|-------|------|------|------|------|
| Indole-3-carboxylic acid                | 0.00 | 0.28  | 0.50 | 0.68 | 0.00 | 0.01 | 0.00 | 0.29  | 0.61 | 0.71 | 0.00 | 0.00 |
| 2-hydroxybenzyl alcohol                 | 0.00 | 0.02  | 0.02 | 0.02 | 0.00 | 0.01 | 0.00 | 0.01  | 0.01 | 0.01 | 0.00 | 0.00 |
| Enterodiol                              | 0.00 | 0.01  | 0.01 | 0.01 | 0.00 | 0.00 | 0.00 | 0.00  | 0.00 | 0.00 | 0.00 | 0.00 |
| Hydroxytyrosol                          | 0.00 | 0.03  | 0.05 | 0.04 | 0.00 | 0.00 | 0.00 | 0.03  | 0.05 | 0.05 | 0.00 | 0.00 |
| 4-hydroxyphenylpropionic acid           | 0.00 | 24.26 | 6.23 | 8.81 | 0.00 | 0.18 | 0.00 | 24.05 | 5.68 | 8.41 | 0.00 | 0.00 |
| I3-Acrylic                              | 0.00 | 0.01  | 0.00 | 0.00 | 0.00 | 0.00 | 0.00 | 0.01  | 0.01 | 0.00 | 0.00 | 0.00 |
| 1, 3-dihydroxybenzene                   | 0.01 | 0.02  | 0.02 | 0.03 | 0.01 | 0.00 | 0.02 | 0.02  | 0.02 | 0.03 | 0.02 | 0.01 |
| deoxycholic acid                        | 2.25 | 1.32  | 1.08 | 0.90 | 0.00 | 0.00 | 2.04 | 1.18  | 0.88 | 0.89 | 0.00 | 0.00 |
| Lithocholic acid                        | 0.94 | 0.57  | 0.57 | 0.51 | 0.00 | 0.00 | 0.86 | 0.75  | 0.57 | 0.37 | 0.00 | 0.00 |
| I3-Pyruvic                              | 0.62 | 0.24  | 0.18 | 0.21 | 0.46 | 0.46 | 0.72 | 0.15  | 0.18 | 0.24 | 0.54 | 0.88 |
| protocatechuic acid                     | 0.55 | 0.28  | 0.14 | 0.12 | 0.53 | 0.52 | 0.33 | 0.22  | 0.15 | 0.15 | 0.31 | 0.38 |
| 2, 3-dihydroxybenzoic acid              | 0.28 | 0.18  | 0.16 | 0.14 | 0.23 | 0.20 | 0.25 | 0.18  | 0.14 | 0.14 | 0.23 | 0.20 |
| 3-methoxy-4-hydroxyphenylpropionic acid | 0.47 | 0.00  | 0.00 | 0.01 | 0.44 | 0.43 | 0.46 | 0.00  | 0.00 | 0.00 | 0.44 | 0.44 |
| Indole-3- acetic acid                   | 0.46 | 0.45  | 0.46 | 0.52 | 0.46 | 0.93 | 0.46 | 0.44  | 0.47 | 0.51 | 0.47 | 0.49 |
| phenylpyruvic acid                      | 0.35 | 0.12  | 0.04 | 0.03 | 0.33 | 0.27 | 0.37 | 0.12  | 0.05 | 0.03 | 0.32 | 0.55 |
| protocatechualdehyde                    | 0.24 | 0.02  | 0.02 | 0.01 | 0.29 | 0.12 | 0.20 | 0.02  | 0.01 | 0.01 | 0.21 | 0.17 |
| 3, 4-dihydroxyphenylacetic acid         | 0.22 | 0.00  | 0.00 | 0.00 | 0.20 | 0.09 | 0.17 | 0.01  | 0.00 | 0.00 | 0.16 | 0.06 |
| Vanillic acid                           | 0.19 | 0.09  | 0.05 | 0.06 | 0.19 | 0.16 | 0.17 | 0.08  | 0.05 | 0.05 | 0.17 | 0.10 |
| 3, 4, 5-trihydroxybenzoic acid          | 0.22 | 0.00  | 0.00 | 0.00 | 0.07 | 0.02 | 0.09 | 0.00  | 0.00 | 0.00 | 0.03 | 0.04 |
| p-Hydroxybenzaldehyde                   | 0.18 | 0.01  | 0.00 | 0.00 | 0.20 | 0.12 | 0.19 | 0.01  | 0.01 | 0.00 | 0.20 | 0.18 |

|                                       |      |      |      |      |      |      |      |      |      |      |      |      |
|---------------------------------------|------|------|------|------|------|------|------|------|------|------|------|------|
| 3-hydroxybenzoic acid                 | 0.17 | 0.15 | 0.15 | 0.16 | 0.17 | 0.19 | 0.16 | 0.15 | 0.15 | 0.16 | 0.16 | 0.16 |
| Syringaresinol                        | 0.20 | 0.00 | 0.00 | 0.00 | 0.19 | 0.15 | 0.18 | 0.00 | 0.00 | 0.00 | 0.19 | 0.22 |
| Vitexin/Isovitexin                    | 0.16 | 0.00 | 0.00 | 0.00 | 0.13 | 0.14 | 0.14 | 0.00 | 0.00 | 0.00 | 0.10 | 0.13 |
| ferulic acid                          | 0.11 | 0.00 | 0.00 | 0.00 | 0.10 | 0.07 | 0.09 | 0.00 | 0.00 | 0.00 | 0.09 | 0.09 |
| Catechin                              | 0.12 | 0.01 | 0.01 | 0.00 | 0.09 | 0.11 | 0.09 | 0.01 | 0.00 | 0.00 | 0.07 | 0.10 |
| Chlorogenic acid                      | 0.04 | 0.00 | 0.00 | 0.00 | 0.01 | 0.00 | 0.01 | 0.00 | 0.00 | 0.00 | 0.01 | 0.00 |
| Enterolactone                         | 0.12 | 0.11 | 0.13 | 0.15 | 0.10 | 0.10 | 0.12 | 0.12 | 0.13 | 0.13 | 0.10 | 0.11 |
| 3, 5-dimethoxy-4-hydroxybenzoic acid  | 0.12 | 0.02 | 0.01 | 0.02 | 0.12 | 0.10 | 0.12 | 0.01 | 0.00 | 0.00 | 0.11 | 0.07 |
| 2, 6-dihydroxybenzoic acid            | 0.05 | 0.04 | 0.04 | 0.04 | 0.04 | 0.04 | 0.04 | 0.04 | 0.04 | 0.04 | 0.04 | 0.04 |
| vanillin                              | 0.12 | 0.00 | 0.00 | 0.00 | 0.13 | 0.08 | 0.12 | 0.00 | 0.00 | 0.00 | 0.12 | 0.12 |
| Fisetin                               | 0.07 | 0.06 | 0.07 | 0.06 | 0.06 | 0.06 | 0.07 | 0.06 | 0.06 | 0.06 | 0.06 | 0.06 |
| 3, 5-dimethoxy-4-hydroxybenzaldehyde  | 0.07 | 0.00 | 0.00 | 0.00 | 0.07 | 0.05 | 0.06 | 0.00 | 0.00 | 0.00 | 0.07 | 0.06 |
| I3-Carboxaldehyde                     | 0.06 | 0.03 | 0.02 | 0.02 | 0.06 | 0.05 | 0.06 | 0.03 | 0.02 | 0.02 | 0.06 | 0.06 |
| Epicatechin                           | 0.03 | 0.01 | 0.02 | 0.01 | 0.03 | 0.05 | 0.02 | 0.00 | 0.01 | 0.01 | 0.02 | 0.03 |
| caffeic acid                          | 0.03 | 0.00 | 0.00 | 0.00 | 0.02 | 0.01 | 0.02 | 0.00 | 0.00 | 0.00 | 0.01 | 0.01 |
| Luteolin                              | 0.02 | 0.00 | 0.00 | 0.00 | 0.01 | 0.01 | 0.02 | 0.00 | 0.00 | 0.00 | 0.01 | 0.01 |
| Hyperoside                            | 0.02 | 0.00 | 0.00 | 0.00 | 0.03 | 0.00 | 0.02 | 0.00 | 0.00 | 0.00 | 0.02 | 0.01 |
| Quercetin-3-Glucoside                 | 0.02 | 0.00 | 0.00 | 0.00 | 0.03 | 0.00 | 0.02 | 0.00 | 0.00 | 0.00 | 0.02 | 0.01 |
| 3-methoxy-4-hydroxyacetophenone       | 0.02 | 0.00 | 0.00 | 0.00 | 0.01 | 0.01 | 0.02 | 0.00 | 0.00 | 0.00 | 0.01 | 0.02 |
| 3, 5-dimethoxy-4-hydroxycinnamic acid | 0.01 | 0.00 | 0.00 | 0.00 | 0.00 | 0.00 | 0.01 | 0.00 | 0.00 | 0.00 | 0.00 | 0.00 |
| ethylferulate                         | 0.01 | 0.00 | 0.00 | 0.00 | 0.00 | 0.00 | 0.01 | 0.00 | 0.00 | 0.00 | 0.00 | 0.00 |
| Equol                                 | 0.01 | 0.01 | 0.01 | 0.01 | 0.01 | 0.01 | 0.01 | 0.01 | 0.01 | 0.00 | 0.01 | 0.01 |

[illegible]

| Set 3<br>compound (ng/ml)     | EC_2_<br>0h | EC_2_2<br>4h | EC_2_4<br>8h | EC_2_7<br>2h | EC_2_<br>0h<br>blank | EC_2_7<br>2h<br>blank | EC_2+ivgd_<br>_0h | EC_2+ivgd_<br>24h | EC_2+ivgd_<br>48h | EC_2+ivgd_<br>72h | EC_2+ivgd_<br>_0h blank | EC_2+ivgd_<br>72h blank |
|-------------------------------|-------------|--------------|--------------|--------------|----------------------|-----------------------|-------------------|-------------------|-------------------|-------------------|-------------------------|-------------------------|
| phenylpropionic acid          | 41.96       | 69.18        | 80.22        | 83.77        | 41.61                | 41.05                 | 41.74             | 66.86             | 95.15             | 96.74             | 40.80                   | 41.21                   |
| phenylacetic acid             | 7.60        | 30.96        | 17.72        | 30.36        | 7.36                 | 7.33                  | 7.69              | 30.14             | 67.70             | 31.44             | 9.53                    | 9.71                    |
| 4-hydroxyphenylacetic acid    | 3.60        | 13.63        | 11.59        | 15.28        | 3.39                 | 3.56                  | 3.61              | 15.02             | 14.72             | 19.38             | 2.98                    | 3.26                    |
| benzoic acid                  | 1.52        | 1.69         | 1.61         | 1.72         | 1.45                 | 1.44                  | 1.48              | 1.63              | 1.68              | 1.77              | 1.56                    | 1.60                    |
| 3-hydroxyphenylpropionic acid | 0.96        | 5.28         | 6.32         | 7.44         | 0.61                 | 0.64                  | 0.88              | 4.42              | 6.14              | 6.43              | 0.56                    | 0.60                    |
| 3-hydroxyphenylacetic acid    | 0.49        | 0.56         | 0.65         | 0.89         | 0.47                 | 0.57                  | 0.48              | 0.52              | 0.73              | 0.77              | 0.56                    | 0.66                    |
| indole 3-propionic acid       | 0.41        | 0.88         | 0.90         | 1.00         | 0.41                 | 0.40                  | 0.41              | 0.81              | 0.93              | 0.94              | 0.43                    | 0.42                    |
| p-hydroxybenzoic acid         | 0.23        | 0.30         | 0.32         | 0.36         | 0.22                 | 0.22                  | 0.19              | 0.25              | 0.30              | 0.33              | 0.19                    | 0.19                    |
| phenyllactic acid             | 0.19        | 0.49         | 0.15         | 0.16         | 0.15                 | 0.23                  | 0.18              | 0.65              | 0.28              | 0.25              | 0.16                    | 0.23                    |
| 1, 2-dihydroxybenzene         | 0.17        | 0.34         | 0.39         | 0.58         | 0.15                 | 0.15                  | 0.15              | 0.23              | 0.25              | 0.39              | 0.13                    | 0.14                    |
| 3-hydroxymandelic acid        | 0.16        | 0.16         | 0.17         | 0.12         | 0.16                 | 0.15                  | 0.13              | 0.15              | 0.09              | 0.10              | 0.13                    | 0.11                    |
| 2-hydroxyphenylpropionic acid | 0.11        | 0.11         | 0.13         | 0.14         | 0.09                 | 0.10                  | 0.10              | 0.10              | 0.12              | 0.13              | 0.10                    | 0.11                    |
| 4-hydroxyphenyllactic acid    | 0.08        | 0.16         | 0.11         | 0.08         | 0.04                 | 0.04                  | 0.09              | 0.18              | 0.10              | 0.07              | 0.07                    | 0.08                    |
| Tyrosol                       | 0.05        | 0.49         | 0.60         | 0.51         | 0.04                 | 0.12                  | 0.05              | 0.54              | 0.53              | 0.60              | 0.04                    | 0.05                    |
| Indole                        | 0.03        | 0.12         | 0.23         | 0.25         | 0.00                 | 0.00                  | 0.00              | 0.11              | 0.20              | 0.22              | 0.06                    | 0.01                    |
| gentisic acid                 | 0.08        | 0.20         | 0.19         | 0.20         | 0.06                 | 0.06                  | 0.00              | 0.04              | 0.06              | 0.04              | 0.00                    | 0.00                    |

|                                         |      |       |       |       |      |      |      |       |      |      |      |      |
|-----------------------------------------|------|-------|-------|-------|------|------|------|-------|------|------|------|------|
| Indole-3-carboxylic acid                | 0.00 | 0.32  | 0.57  | 0.76  | 0.00 | 0.00 | 0.00 | 0.29  | 0.66 | 0.73 | 0.00 | 0.00 |
| 2-hydroxybenzyl alcohol                 | 0.00 | 0.01  | 0.02  | 0.02  | 0.00 | 0.01 | 0.00 | 0.01  | 0.01 | 0.01 | 0.00 | 0.00 |
| Enterodiol                              | 0.00 | 0.01  | 0.01  | 0.01  | 0.00 | 0.00 | 0.00 | 0.00  | 0.00 | 0.00 | 0.00 | 0.00 |
| Hydroxytyrosol                          | 0.00 | 0.03  | 0.04  | 0.04  | 0.00 | 0.00 | 0.00 | 0.02  | 0.04 | 0.05 | 0.00 | 0.00 |
| 4-hydroxyphenylpropionic acid           | 0.00 | 22.09 | 16.05 | 18.61 | 0.00 | 0.00 | 0.00 | 37.21 | 4.05 | 5.48 | 0.00 | 0.00 |
| l3-Acrylic                              | 0.00 | 0.01  | 0.00  | 0.00  | 0.00 | 0.00 | 0.00 | 0.01  | 0.01 | 0.00 | 0.00 | 0.00 |
| 1, 3-dihydroxybenzene                   | 0.01 | 0.02  | 0.02  | 0.02  | 0.02 | 0.00 | 0.01 | 0.01  | 0.02 | 0.03 | 0.01 | 0.02 |
| deoxycholic acid                        | 2.50 | 1.38  | 1.29  | 1.16  | 0.00 | 0.00 | 1.83 | 0.97  | 0.85 | 0.88 | 0.00 | 0.00 |
| Lithocholic acid                        | 1.20 | 0.76  | 0.70  | 0.77  | 0.00 | 0.00 | 0.81 | 0.59  | 0.54 | 0.55 | 0.00 | 0.00 |
| l3-Pyruvic                              | 0.71 | 0.23  | 0.18  | 0.24  | 0.52 | 0.37 | 0.78 | 0.33  | 0.18 | 0.24 | 0.67 | 0.59 |
| protocatechuic acid                     | 0.58 | 0.23  | 0.12  | 0.11  | 0.57 | 0.61 | 0.33 | 0.22  | 0.18 | 0.16 | 0.32 | 0.37 |
| 2, 3-dihydroxybenzoic acid              | 0.27 | 0.18  | 0.17  | 0.15  | 0.23 | 0.20 | 0.24 | 0.17  | 0.14 | 0.14 | 0.24 | 0.22 |
| 3-methoxy-4-hydroxyphenylpropionic acid | 0.48 | 0.00  | 0.00  | 0.00  | 0.45 | 0.46 | 0.48 | 0.00  | 0.00 | 0.00 | 0.47 | 0.48 |
| Indole-3- acetic acid                   | 0.47 | 0.45  | 0.47  | 0.55  | 0.47 | 0.48 | 0.47 | 0.42  | 0.49 | 0.53 | 0.45 | 0.46 |
| phenylpyruvic acid                      | 0.39 | 0.10  | 0.03  | 0.02  | 0.33 | 0.31 | 0.36 | 0.11  | 0.04 | 0.02 | 0.33 | 0.49 |
| protocatechualdehyde                    | 0.26 | 0.02  | 0.02  | 0.01  | 0.27 | 0.16 | 0.20 | 0.02  | 0.01 | 0.01 | 0.21 | 0.18 |
| 3, 4-dihydroxyphenylacetic acid         | 0.21 | 0.00  | 0.00  | 0.00  | 0.18 | 0.10 | 0.14 | 0.00  | 0.00 | 0.00 | 0.19 | 0.06 |
| Vanillic acid                           | 0.20 | 0.10  | 0.06  | 0.06  | 0.19 | 0.19 | 0.18 | 0.07  | 0.05 | 0.05 | 0.17 | 0.15 |
| 3, 4, 5-trihydroxybenzoic acid          | 0.17 | 0.00  | 0.00  | 0.00  | 0.07 | 0.05 | 0.08 | 0.00  | 0.00 | 0.00 | 0.02 | 0.02 |



|                                      |      |      |      |      |      |      |      |      |      |      |      |      |
|--------------------------------------|------|------|------|------|------|------|------|------|------|------|------|------|
| p-Hydroxybenzaldehyde                | 0.19 | 0.01 | 0.00 | 0.00 | 0.20 | 0.15 | 0.18 | 0.01 | 0.01 | 0.00 | 0.21 | 0.21 |
| 3-hydroxybenzoic acid                | 0.16 | 0.15 | 0.15 | 0.17 | 0.17 | 0.17 | 0.16 | 0.15 | 0.16 | 0.18 | 0.14 | 0.14 |
| Syringaresinol                       | 0.19 | 0.00 | 0.00 | 0.00 | 0.22 | 0.24 | 0.17 | 0.00 | 0.00 | 0.00 | 0.18 | 0.22 |
| Vitexin/Isovitexin                   | 0.16 | 0.00 | 0.00 | 0.00 | 0.17 | 0.16 | 0.15 | 0.00 | 0.00 | 0.00 | 0.10 | 0.13 |
| ferulic acid                         | 0.10 | 0.00 | 0.00 | 0.00 | 0.12 | 0.11 | 0.08 | 0.00 | 0.00 | 0.00 | 0.09 | 0.10 |
| Catechin                             | 0.10 | 0.00 | 0.00 | 0.00 | 0.11 | 0.16 | 0.08 | 0.01 | 0.00 | 0.00 | 0.07 | 0.09 |
| Chlorogenic acid                     | 0.02 | 0.00 | 0.00 | 0.00 | 0.01 | 0.00 | 0.00 | 0.00 | 0.00 | 0.00 | 0.00 | 0.00 |
| Enterolactone                        | 0.12 | 0.12 | 0.15 | 0.16 | 0.11 | 0.10 | 0.12 | 0.12 | 0.13 | 0.14 | 0.14 | 0.12 |
| 3, 5-dimethoxy-4-hydroxybenzoic acid | 0.12 | 0.02 | 0.00 | 0.00 | 0.12 | 0.10 | 0.12 | 0.01 | 0.00 | 0.00 | 0.12 | 0.09 |
| 2, 6-dihydroxybenzoic acid           | 0.05 | 0.04 | 0.04 | 0.04 | 0.04 | 0.04 | 0.04 | 0.04 | 0.04 | 0.04 | 0.04 | 0.04 |
| vanillin                             | 0.13 | 0.00 | 0.00 | 0.00 | 0.13 | 0.10 | 0.12 | 0.00 | 0.00 | 0.00 | 0.13 | 0.14 |
| Fisetin                              | 0.07 | 0.06 | 0.07 | 0.06 | 0.06 | 0.07 | 0.07 | 0.07 | 0.06 | 0.06 | 0.06 | 0.06 |
| 3, 5-dimethoxy-4-hydroxybenzaldehyde | 0.07 | 0.00 | 0.00 | 0.00 | 0.07 | 0.07 | 0.07 | 0.00 | 0.00 | 0.00 | 0.07 | 0.07 |
| 13-Carboxaldehyde                    | 0.06 | 0.03 | 0.02 | 0.02 | 0.06 | 0.05 | 0.06 | 0.03 | 0.02 | 0.02 | 0.07 | 0.06 |
| Epicatechin                          | 0.03 | 0.00 | 0.02 | 0.01 | 0.03 | 0.05 | 0.02 | 0.00 | 0.01 | 0.01 | 0.01 | 0.02 |
| caffeic acid                         | 0.03 | 0.00 | 0.00 | 0.00 | 0.02 | 0.02 | 0.02 | 0.00 | 0.00 | 0.00 | 0.01 | 0.01 |
| Luteolin                             | 0.02 | 0.00 | 0.00 | 0.00 | 0.01 | 0.01 | 0.02 | 0.00 | 0.00 | 0.00 | 0.01 | 0.01 |
| Hyperoside                           | 0.02 | 0.00 | 0.00 | 0.00 | 0.04 | 0.02 | 0.02 | 0.00 | 0.00 | 0.00 | 0.02 | 0.01 |
| Quercetin-3-Glucoside                | 0.02 | 0.00 | 0.00 | 0.00 | 0.03 | 0.02 | 0.02 | 0.00 | 0.00 | 0.00 | 0.02 | 0.01 |
| 3-methoxy-4-hydroxyacetophenone      | 0.02 | 0.00 | 0.00 | 0.00 | 0.01 | 0.02 | 0.01 | 0.00 | 0.00 | 0.00 | 0.01 | 0.02 |

[illegible]

Epigallocatechin      0.00      0.00      0.00      0.00      0.00      0.00      0.00      0.00      0.00      0.00      0.00      0.00

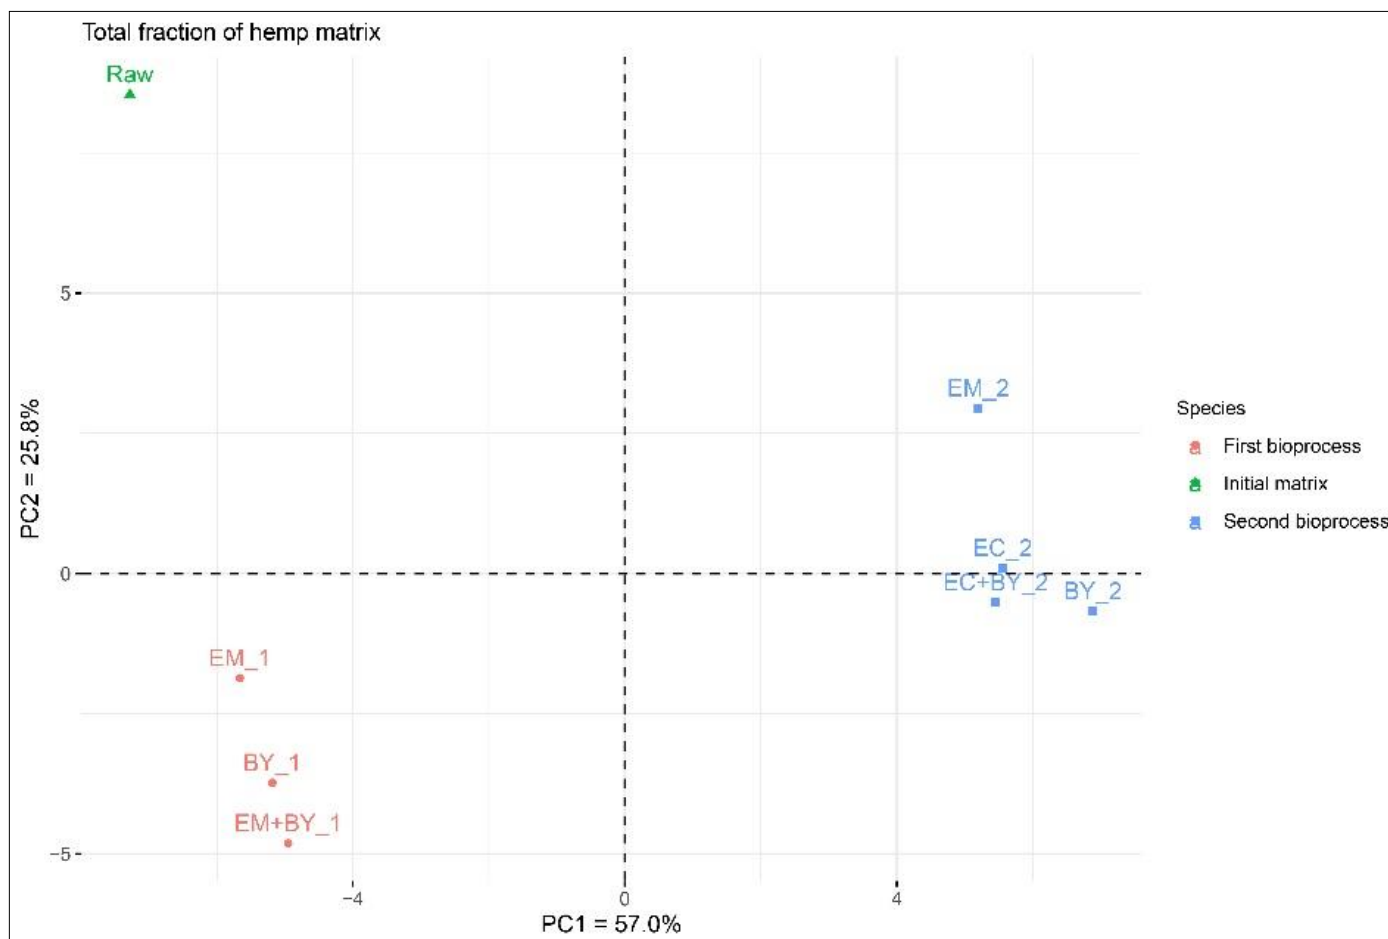

**Figure S1.** Principal component analysis showing discrimination between raw, first bioprocessed, and second bioprocessed hempseed screenings based on the total content (the sum of free, alkaline, and acid fractions) for all the plant metabolites measured by LC-MS/MS.
